# Supplementary material for: Brasesquilignan A–E, Five New Furofurans Lignans from Selaginella braunii Baker
Source: MDPI journal article supplement (doi:10.3390/molecules27196349), 2022-09-26
Supplement: s1 [file s1]

**rasesquilignan A-E, five new furofurans lignans from *Selaginella braunii* Baker**

Fei Cheng <sup>1,2</sup>, Jianping Wu <sup>1,5</sup>, Yan Zhang <sup>1</sup>, Yuyan Wang <sup>1,5</sup>, Guihua Li <sup>1,5</sup>, Hongliang Zeng <sup>2</sup>, Xiaoi He <sup>3</sup>, Guiming Deng <sup>4</sup>, Jianbin Tan <sup>1,6</sup>, Hongping Long <sup>4</sup>, Puhua Zeng <sup>2</sup>, Yiheng Liu <sup>3</sup>, Gangzhi Zhu <sup>3</sup>, Zuhui Chen <sup>5</sup>, Kangping Xu <sup>1,4,5,6\*</sup>

<sup>1</sup>*Xiangya School of Pharmaceutical Sciences, Central South University, Changsha, 410013, China*

<sup>2</sup>*Institute of Chinese Materia Medica, Hunan Academy of Chinese Medicine, Changsha, 410013, China*

<sup>3</sup>*Haikou People's Hospital and Central South University, Xiangya School of Medicine Affiliated Haikou Hospital, Haikou, 570208, China*

<sup>4</sup>*The First Hospital of Hunan University of Chinese Medicine, Changsha, 410007, China*

<sup>5</sup>*Hunan QingYa Health Service Limited Company, Changsha, 410000, China*

<sup>6</sup>*Hunan Key laboratory of Diagnostic and Therapeutic Drug Research for Chronic Diseases, Central South University, Changsha, 410013, Changsha, China*

---

\*Corresponding authors: Kangping Xu (K.P. X)

E-mail addresses: [xukp395@csu.edu.cn](mailto:xukp395@csu.edu.cn)

## Contents

|                                                                                                                |    |
|----------------------------------------------------------------------------------------------------------------|----|
| <b>Figure S1.</b> HRESIMS spectrum of compound <b>1</b> .....                                                  | 4  |
| <b>Figure S2.</b> $^1\text{H}$ NMR spectrum of compound <b>1</b> (DMSO- $d_6$ , 500MHz) .....                  | 4  |
| <b>Figure S3.</b> $^{13}\text{C}$ NMR spectrum of compound <b>1</b> (DMSO- $d_6$ , 125MHz) .....               | 5  |
| <b>Figure S4.</b> DEPT135 spectrum of compound <b>1</b> (DMSO- $d_6$ , 125MHz).....                            | 5  |
| <b>Figure S5.</b> $^1\text{H}$ - $^1\text{H}$ COSY spectrum of compound <b>1</b> (DMSO- $d_6$ , 500MHz) .....  | 6  |
| <b>Figure S6.</b> HSQC spectrum of compound <b>1</b> (DMSO- $d_6$ , 500MHz).....                               | 6  |
| <b>Figure S7.</b> HMBC spectrum of compound <b>1</b> (DMSO- $d_6$ , 500MHz).....                               | 7  |
| <b>Figure S8.</b> NOESY spectrum of compound <b>1</b> (DMSO- $d_6$ , 500MHz) .....                             | 7  |
| <b>Figure S9.</b> CD spectrum of compound <b>1</b> (in MeOH) .....                                             | 8  |
| <b>Figure S10.</b> GC-MS spectrum of compound <b>1</b> .....                                                   | 8  |
| <b>Figure S11.</b> HRESIMS spectrum of compound <b>2</b> .....                                                 | 9  |
| <b>Figure S12.</b> $^1\text{H}$ NMR spectrum of compound <b>2</b> (DMSO- $d_6$ , 500MHz) .....                 | 9  |
| <b>Figure S13.</b> $^{13}\text{C}$ NMR spectrum of compound <b>2</b> (DMSO- $d_6$ , 125MHz) .....              | 10 |
| <b>Figure S14.</b> DEPT135 spectrum of compound <b>2</b> (DMSO- $d_6$ , 125MHz).....                           | 10 |
| <b>Figure S15.</b> $^1\text{H}$ - $^1\text{H}$ COSY spectrum of compound <b>2</b> (DMSO- $d_6$ , 500MHz) ..... | 11 |
| <b>Figure S16.</b> HSQC spectrum of compound <b>2</b> (DMSO- $d_6$ , 500MHz).....                              | 11 |
| <b>Figure S17.</b> HMBC spectrum of compound <b>2</b> (DMSO- $d_6$ , 500MHz).....                              | 12 |
| <b>Figure S18.</b> NOESY spectrum of compound <b>2</b> (DMSO- $d_6$ , 500MHz) .....                            | 12 |
| <b>Figure S19.</b> CD spectrum of compound <b>2</b> (in MeOH) .....                                            | 13 |
| <b>Figure S20.</b> GC-MS spectrum of compound <b>2</b> .....                                                   | 13 |
| <b>Figure S21.</b> HRESIMS spectrum of compound <b>3</b> .....                                                 | 14 |
| <b>Figure S22.</b> $^1\text{H}$ NMR spectrum of compound <b>3</b> (DMSO- $d_6$ , 500MHz) .....                 | 14 |
| <b>Figure S23.</b> $^{13}\text{C}$ NMR spectrum of compound <b>3</b> (DMSO- $d_6$ , 125MHz) .....              | 15 |
| <b>Figure S24.</b> DEPT135 spectrum of compound <b>3</b> (DMSO- $d_6$ , 125MHz).....                           | 15 |
| <b>Figure S25.</b> $^1\text{H}$ - $^1\text{H}$ COSY spectrum of compound <b>3</b> (DMSO- $d_6$ , 500MHz) ..... | 16 |
| <b>Figure S26.</b> HSQC spectrum of compound <b>3</b> (DMSO- $d_6$ , 500MHz).....                              | 16 |
| <b>Figure S27.</b> HMBC spectrum of compound <b>3</b> (DMSO- $d_6$ , 500MHz).....                              | 17 |
| <b>Figure S28.</b> NOESY spectrum of compound <b>3</b> (DMSO- $d_6$ , 500MHz) .....                            | 17 |
| <b>Figure S29.</b> CD spectrum of compound <b>3</b> (in MeOH) .....                                            | 18 |

|                                                                                                                |    |
|----------------------------------------------------------------------------------------------------------------|----|
| <b>Figure S30.</b> GC-MS spectrum of compound <b>3</b> .....                                                   | 18 |
| <b>Figure S31.</b> HRESIMS spectrum of compound <b>4</b> .....                                                 | 19 |
| <b>Figure S32.</b> CD spectrum of compound <b>4</b> (in MeOH) .....                                            | 19 |
| <b>Figure S33.</b> $^1\text{H}$ NMR spectrum of compound <b>4</b> (DMSO- $d_6$ , 500MHz) .....                 | 20 |
| <b>Figure S34.</b> $^{13}\text{C}$ NMR spectrum of compound <b>4</b> (DMSO- $d_6$ , 125MHz) .....              | 20 |
| <b>Figure S35.</b> $^1\text{H}$ - $^1\text{H}$ COSY spectrum of compound <b>4</b> (DMSO- $d_6$ , 500MHz) ..... | 21 |
| <b>Figure S36.</b> HSQC spectrum of compound <b>4</b> (DMSO- $d_6$ , 500MHz).....                              | 21 |
| <b>Figure S37.</b> HMBC spectrum of compound <b>4</b> (DMSO- $d_6$ , 500MHz).....                              | 22 |
| <b>Figure S38.</b> NOESY spectrum of compound <b>4</b> (DMSO- $d_6$ , 500MHz) .....                            | 22 |
| <b>Figure S39.</b> GC-MS spectrum of compound <b>4</b> .....                                                   | 23 |
| <b>Figure S40.</b> HRESIMS spectrum of compound <b>5</b> .....                                                 | 23 |
| <b>Figure S41.</b> CD spectrum of compound <b>5</b> (in MeOH) .....                                            | 24 |
| <b>Figure S42.</b> $^1\text{H}$ NMR spectrum of compound <b>5</b> (DMSO- $d_6$ , 500MHz) .....                 | 24 |
| <b>Figure S43.</b> $^{13}\text{C}$ NMR spectrum of compound <b>5</b> (DMSO- $d_6$ , 125MHz) .....              | 25 |
| <b>Figure S44.</b> DEPT135 spectrum of compound <b>5</b> (DMSO- $d_6$ , 125MHz).....                           | 25 |
| <b>Figure S45.</b> $^1\text{H}$ - $^1\text{H}$ COSY spectrum of compound <b>5</b> (DMSO- $d_6$ , 500MHz) ..... | 26 |
| <b>Figure S46.</b> HSQC spectrum of compound <b>5</b> (DMSO- $d_6$ , 500MHz).....                              | 26 |
| <b>Figure S47.</b> HMBC spectrum of compound <b>5</b> (DMSO- $d_6$ , 500MHz).....                              | 27 |
| <b>Figure S48.</b> NOESY spectrum of compound <b>5</b> (DMSO- $d_6$ , 500MHz) .....                            | 27 |

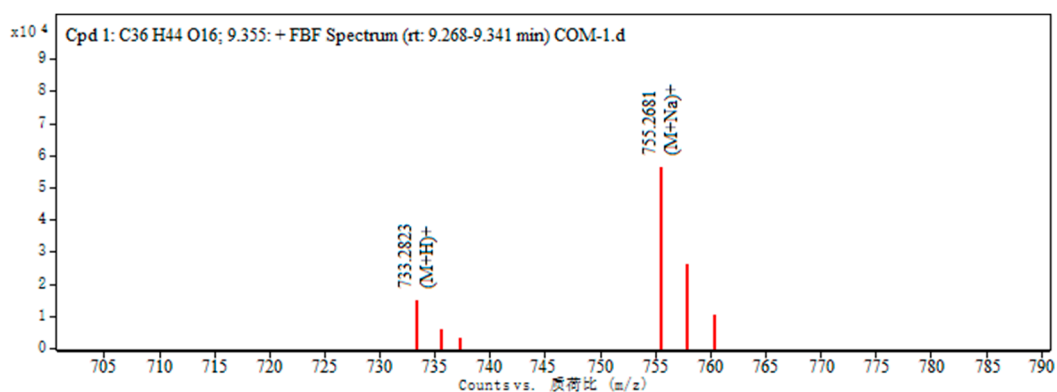

Figure S1. HRESIMS spectrum of compound **1**

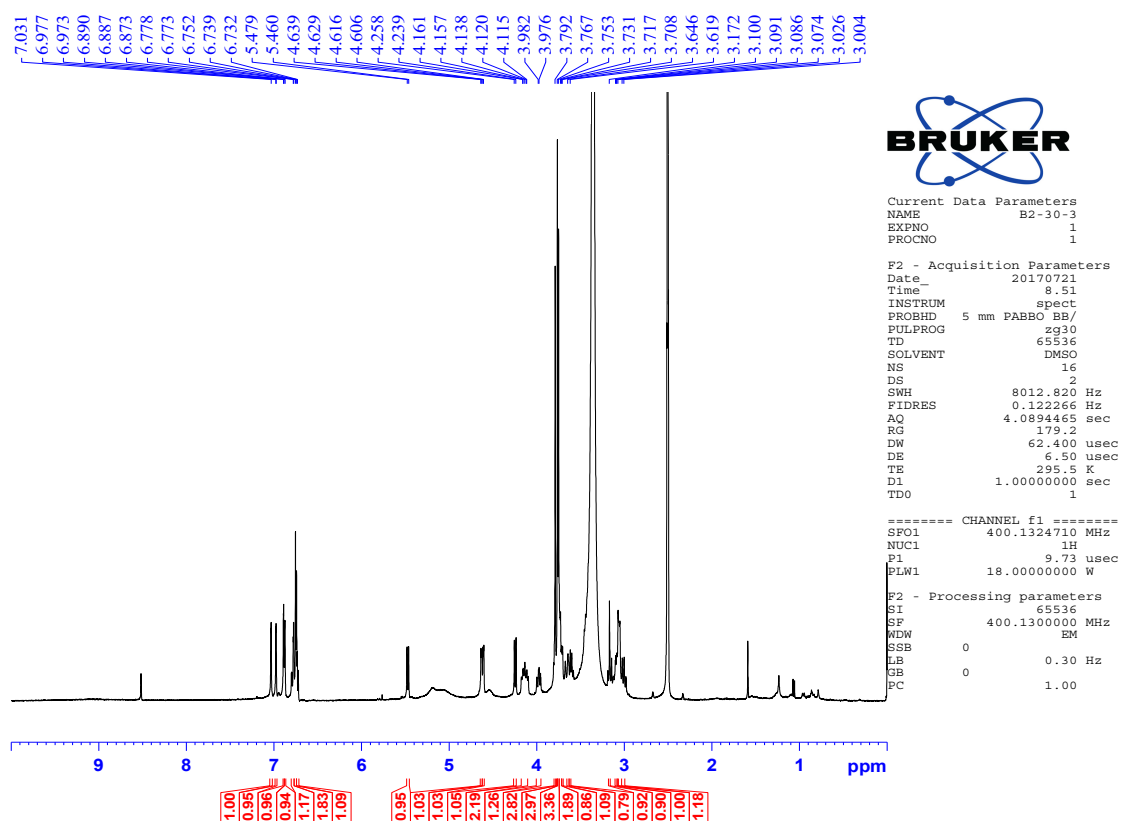

Figure S2. <sup>1</sup>H NMR spectrum of compound **1** (DMSO-*d*<sub>6</sub>, 500MHz)

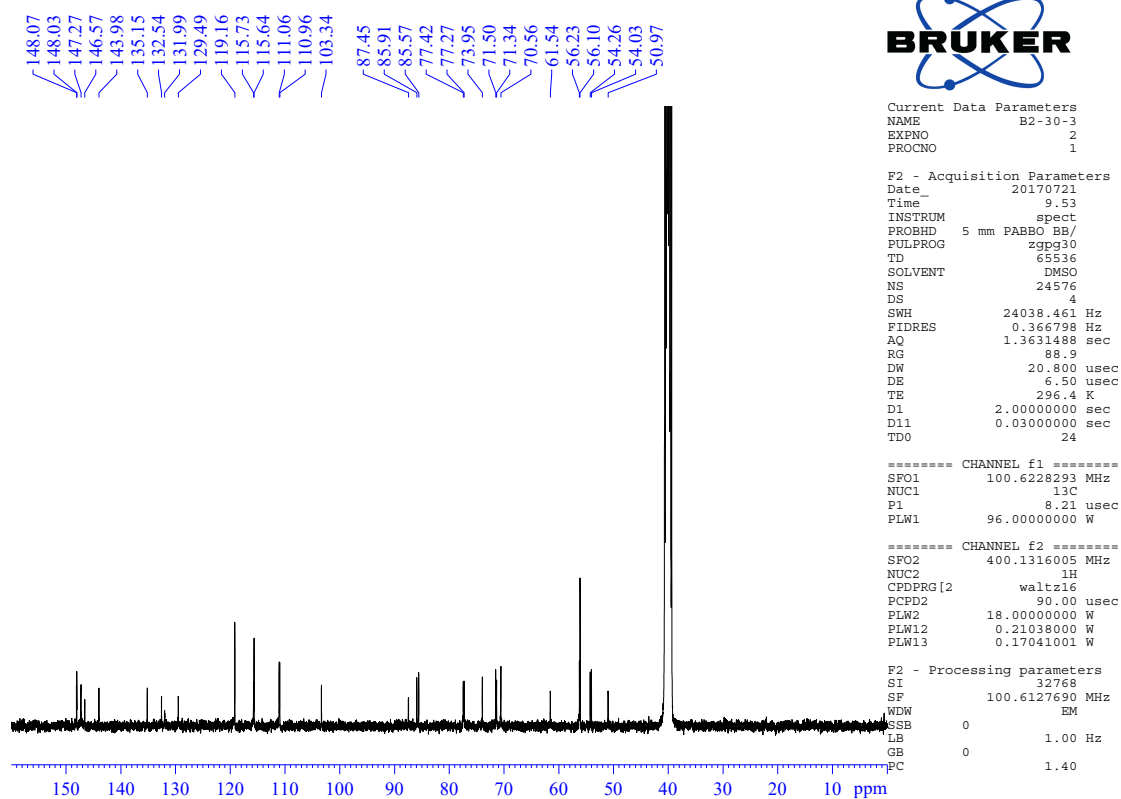

Figure S3.  $^{13}\text{C}$  NMR spectrum of compound 1 (DMSO- $d_6$ , 125MHz)

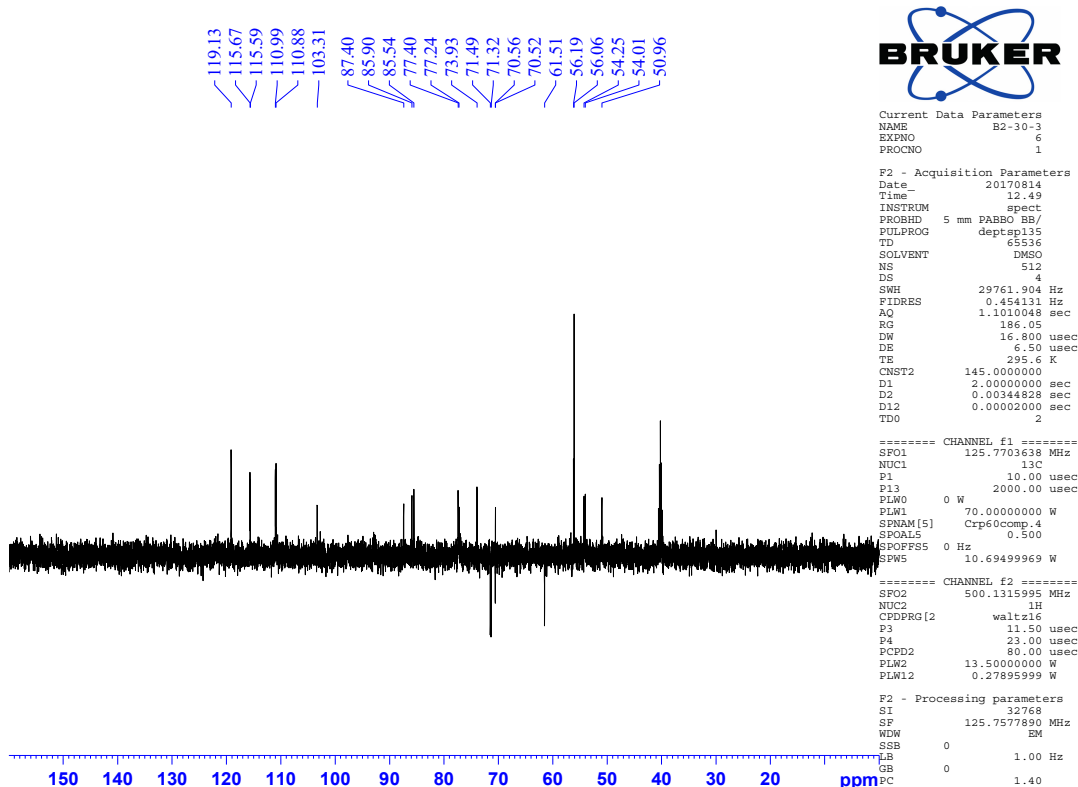

Figure S4. DEPT135 spectrum of compound 1 (DMSO- $d_6$ , 125MHz)

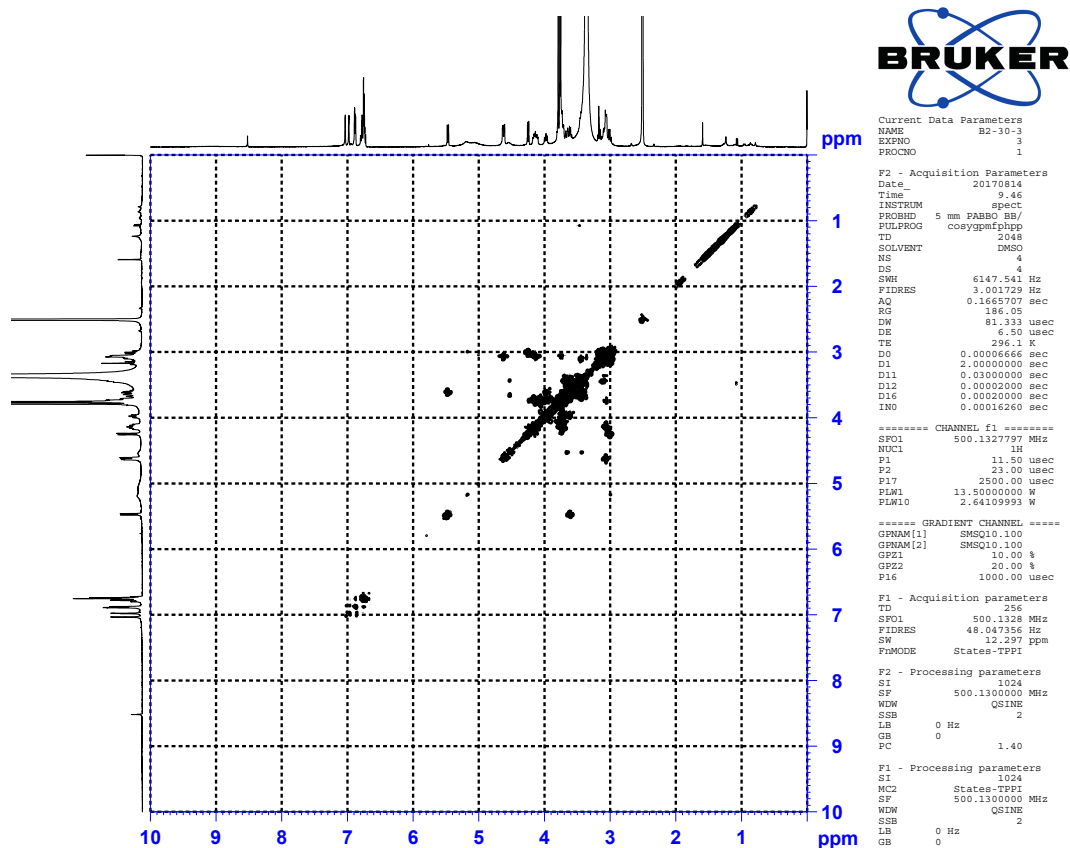

Figure S5.  $^1\text{H}$ - $^1\text{H}$  COSY spectrum of compound **1** (DMSO- $d_6$ , 500MHz)

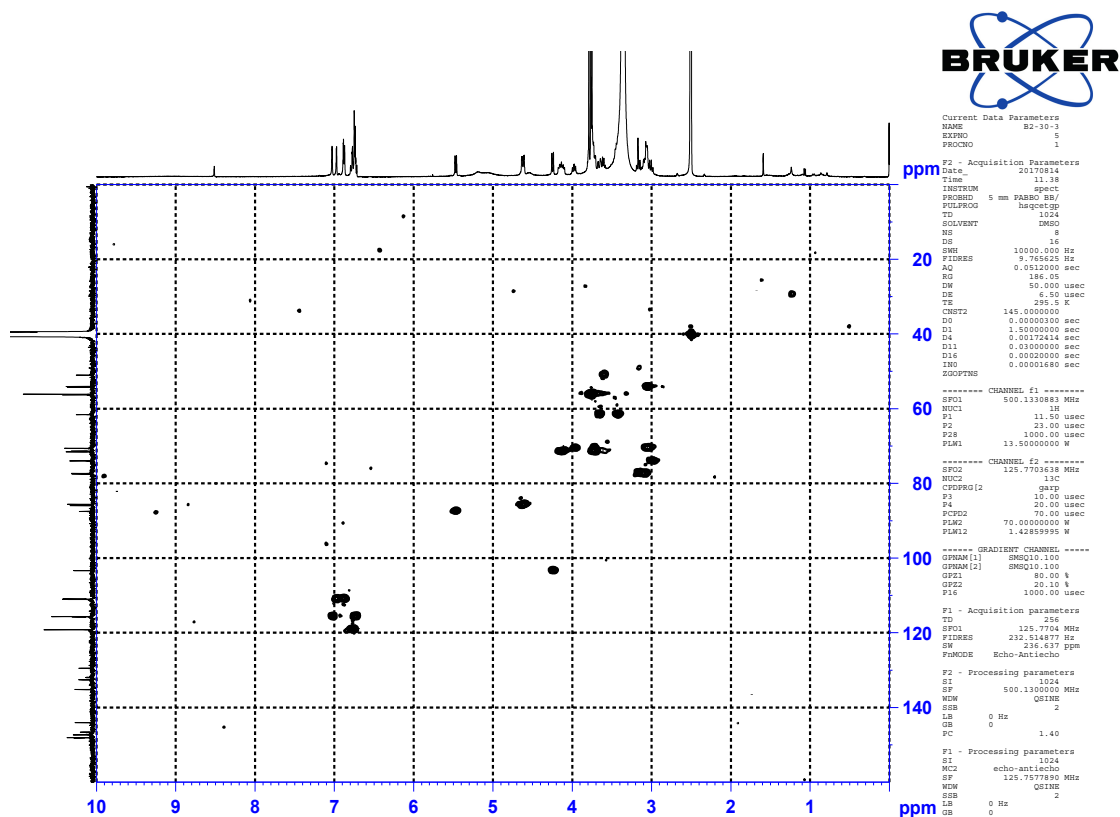

Figure S6. HSQC spectrum of compound **1** (DMSO- $d_6$ , 500MHz)

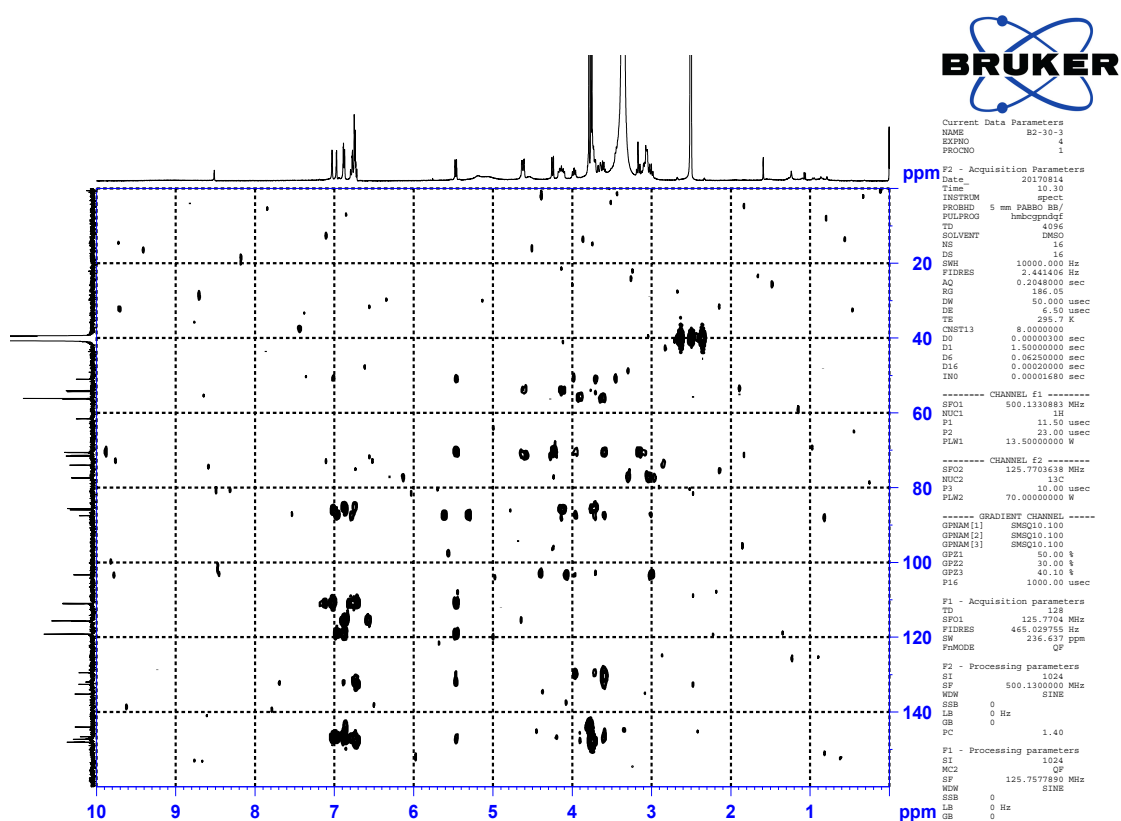

Figure S7. HMBC spectrum of compound **1** (DMSO-*d*<sub>6</sub>, 500MHz)

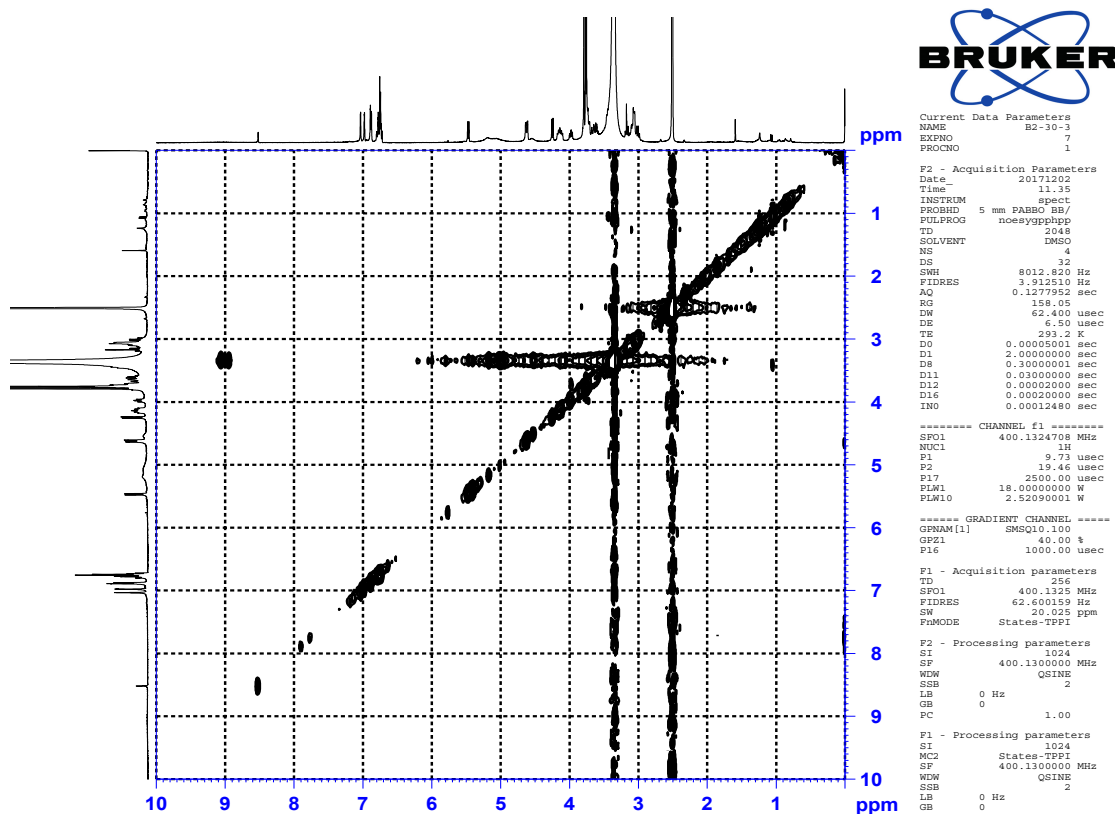

Figure S8. NOESY spectrum of compound **1** (DMSO-*d*<sub>6</sub>, 500MHz)

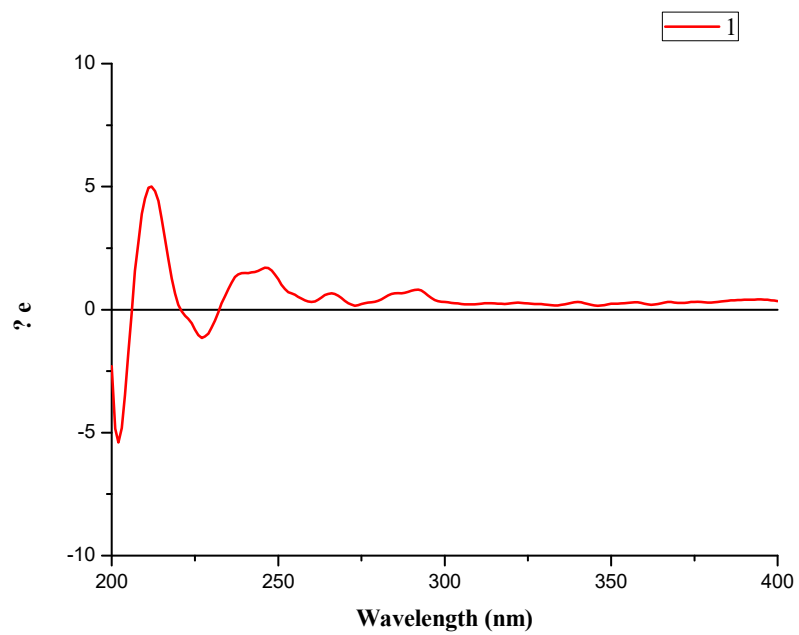

**Figure S9.** CD spectrum of compound **1** (in MeOH)

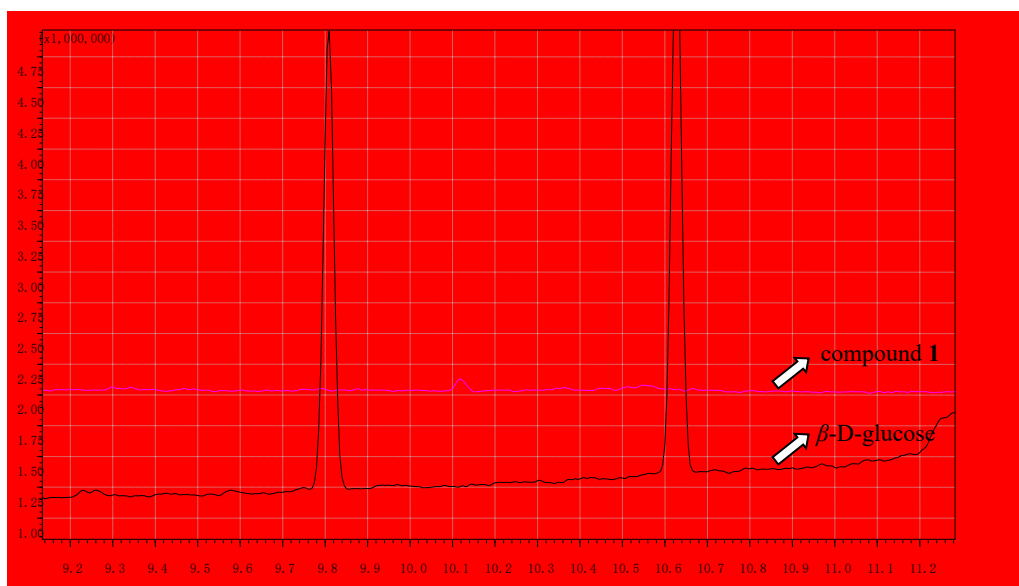

**Figure S10.** GC-MS spectrum of compound **1**



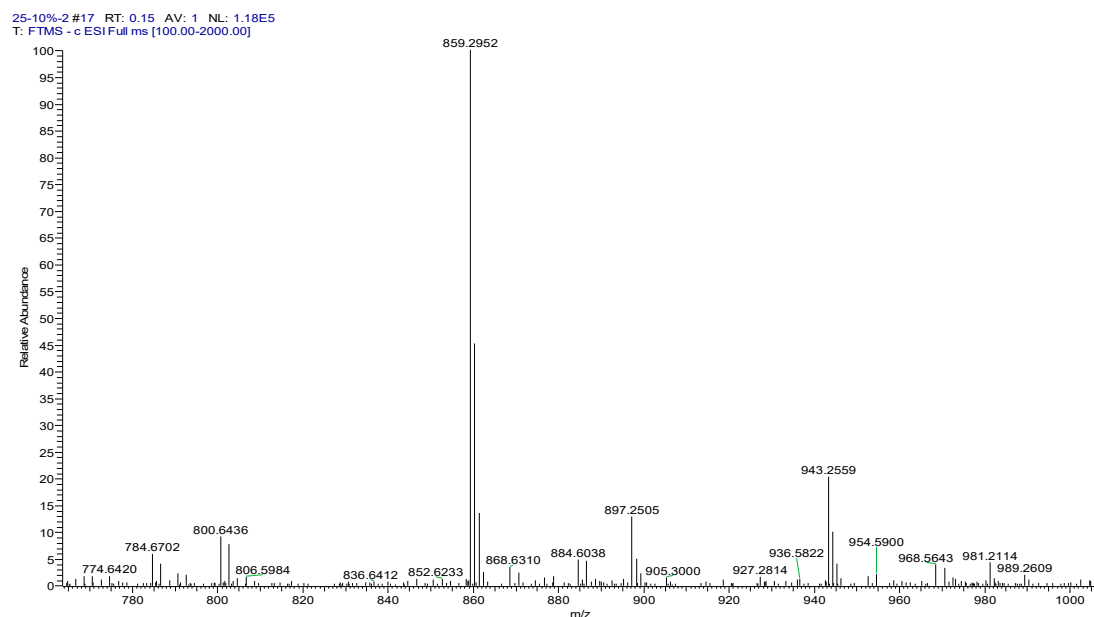

Figure S11. HRESIMS spectrum of compound 2

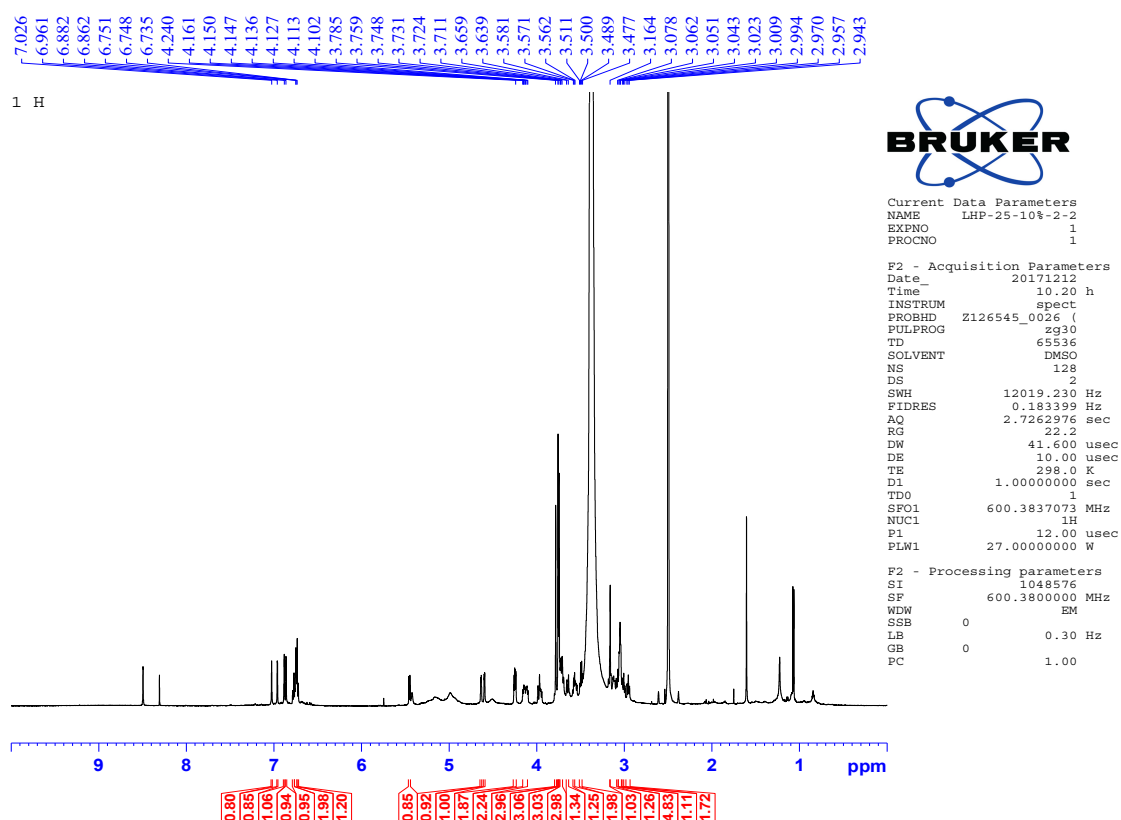

Figure S12.  $^1\text{H}$  NMR spectrum of compound 2 (DMSO- $d_6$ , 500MHz)

<sup>1</sup> H

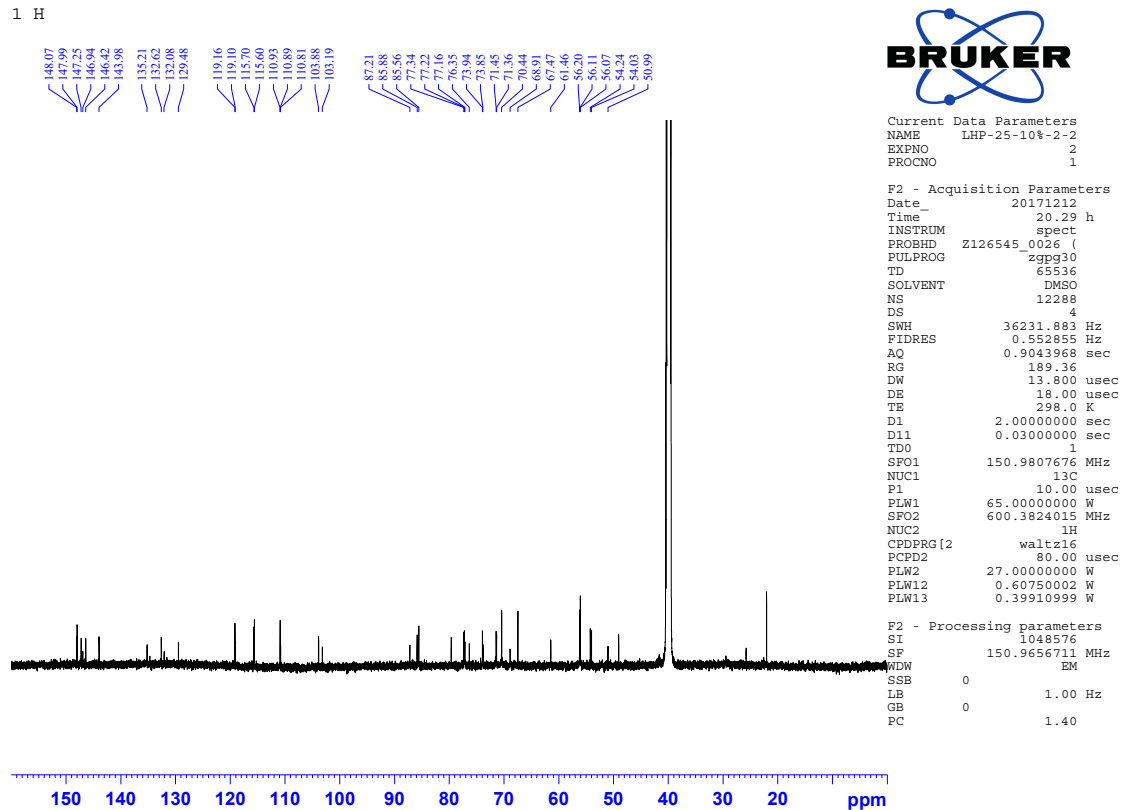

Figure S13. <sup>13</sup>C NMR spectrum of compound **2** (DMSO-*d*<sub>6</sub>, 125MHz)

DEPT 135

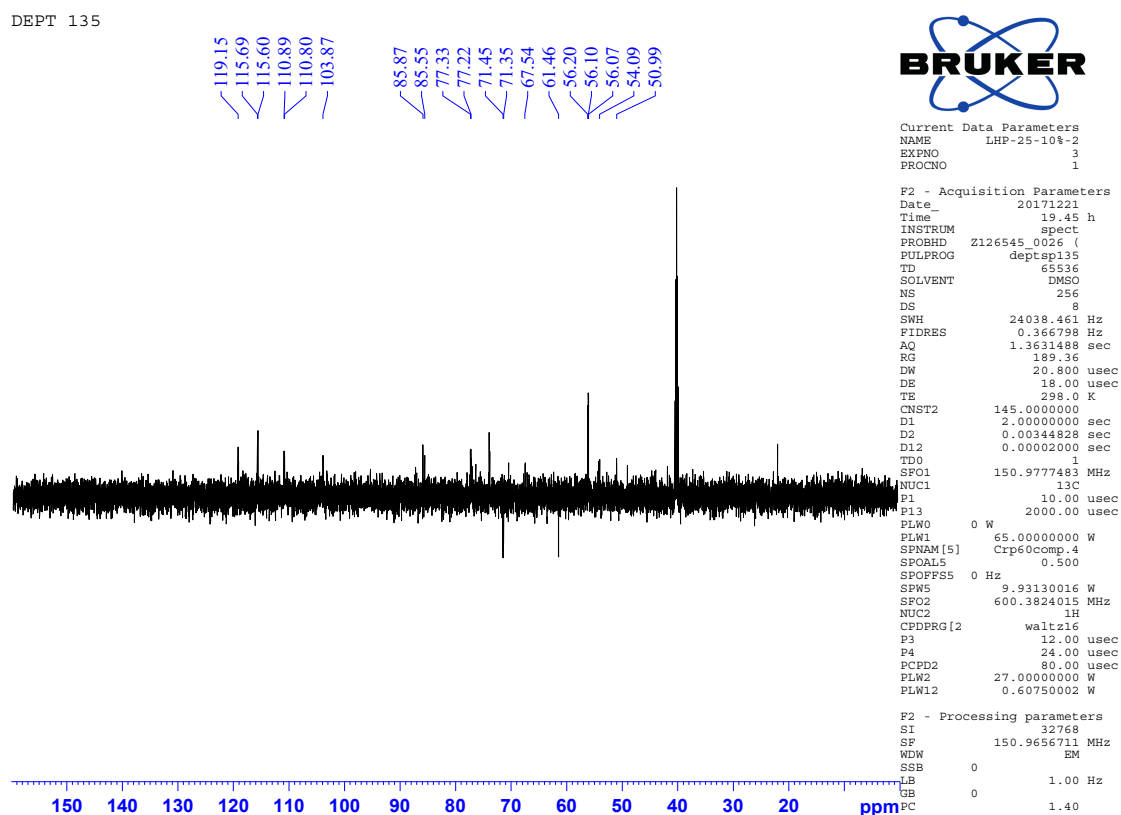

Figure S14. DEPT135 spectrum of compound **2** (DMSO-*d*<sub>6</sub>, 125MHz)

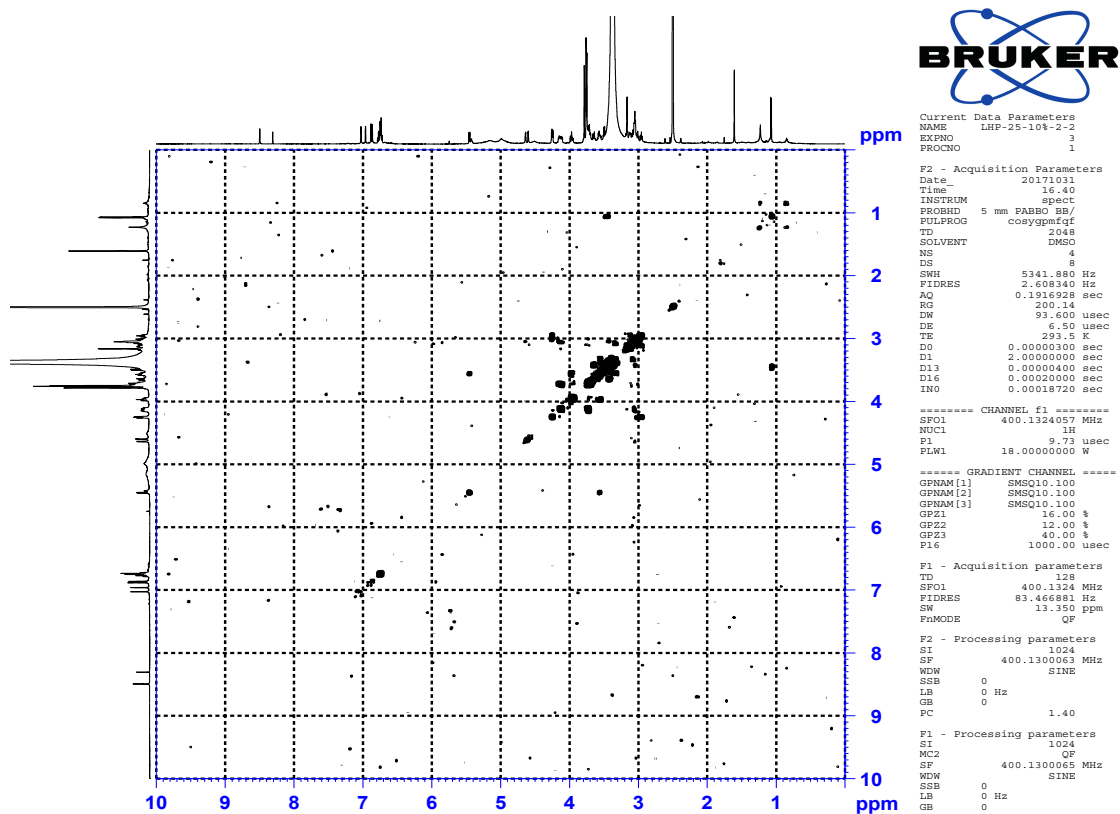

Figure S15.  $^1\text{H}$ - $^1\text{H}$  COSY spectrum of compound **2** (DMSO- $d_6$ , 500MHz)

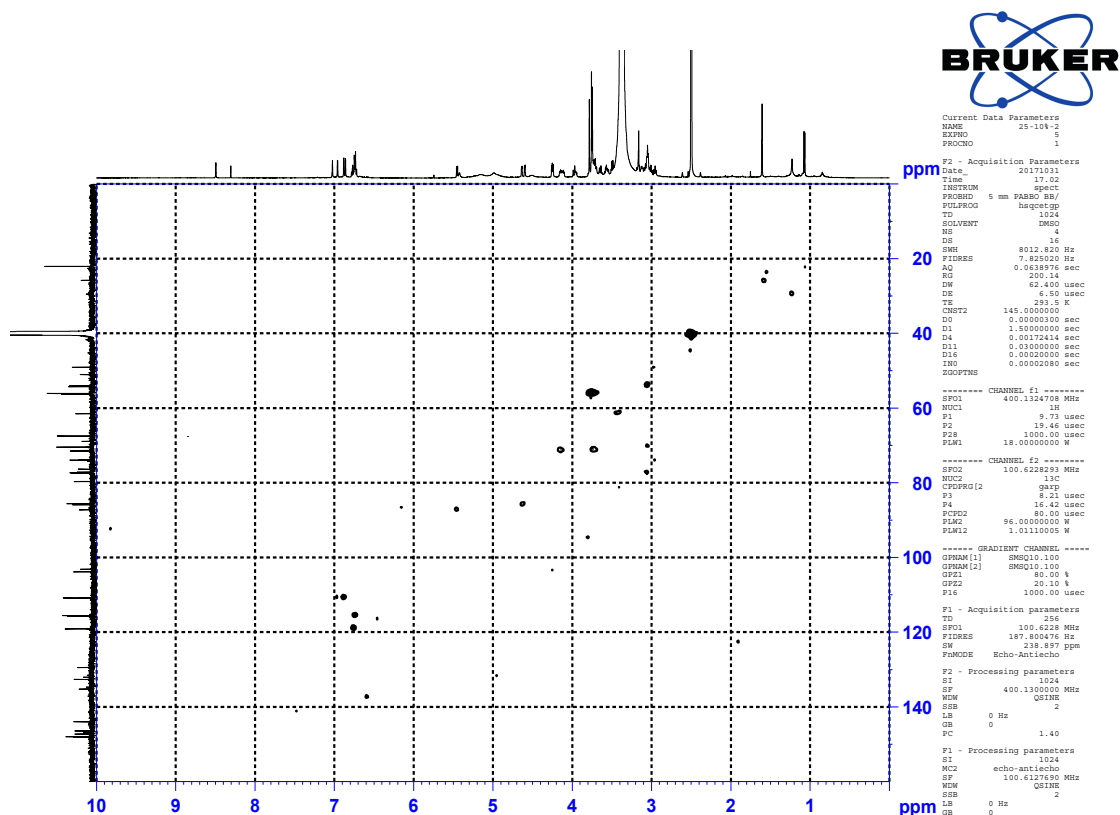

Figure S16. HSQC spectrum of compound **2** (DMSO- $d_6$ , 500MHz)

F

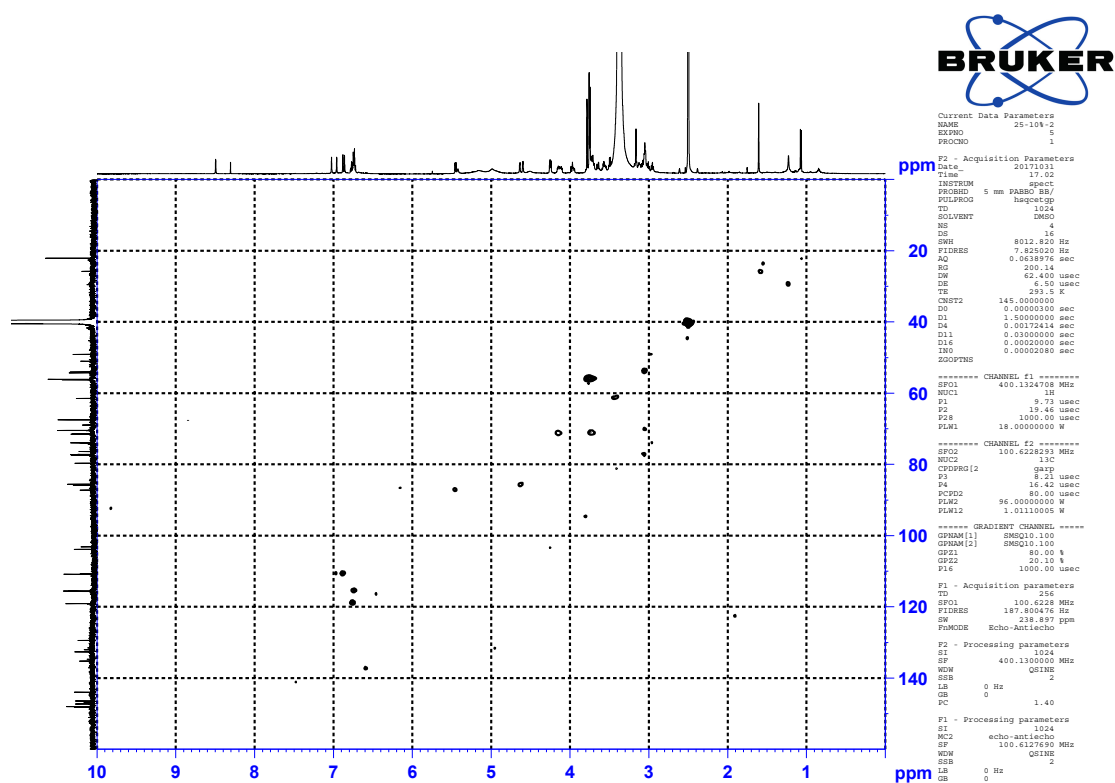Figure S17. HMBC spectrum of compound 2 (DMSO-*d*<sub>6</sub>, 500MHz)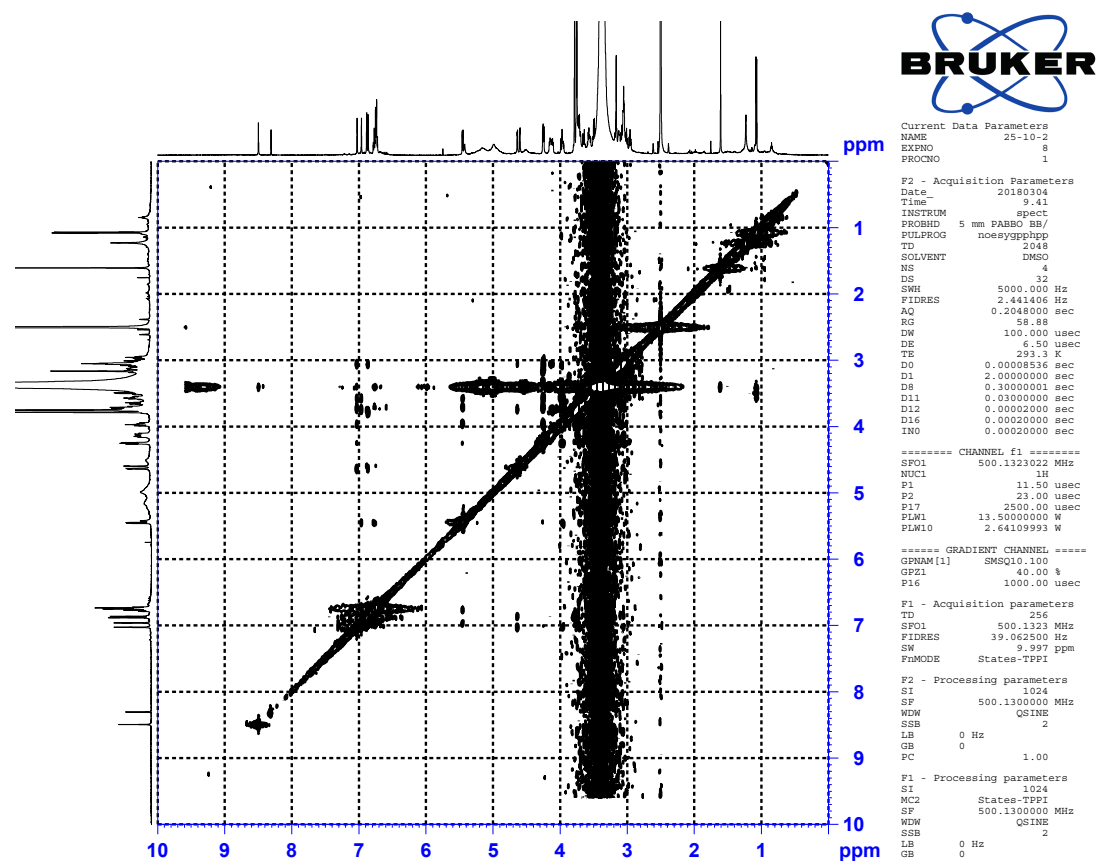Figure S18. NOESY spectrum of compound 2 (DMSO-*d*<sub>6</sub>, 500MHz)

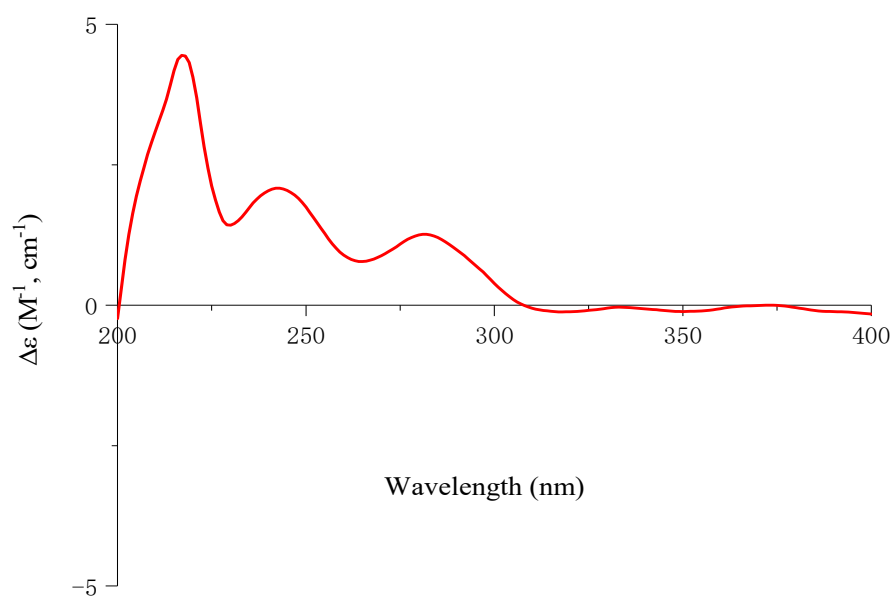

**Figure S19.** CD spectrum of compound **2** (in MeOH)

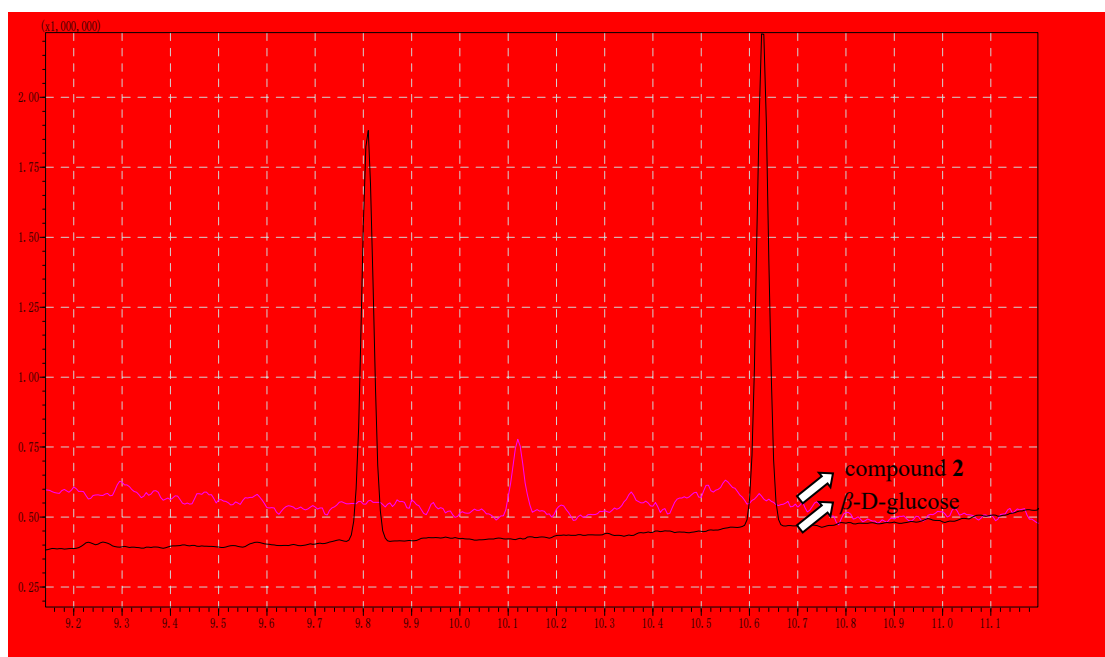

**Figure S20.** GC-MS spectrum of compound **2**

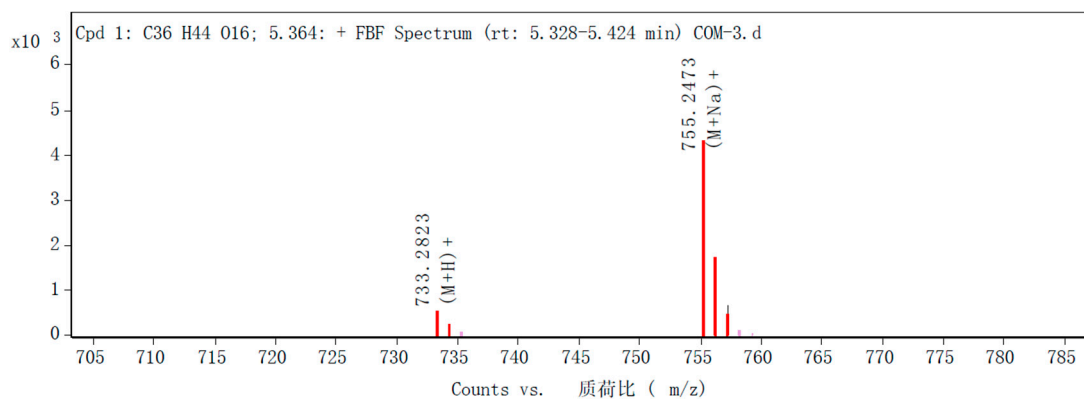

Figure S21. HRESIMS spectrum of compound 3

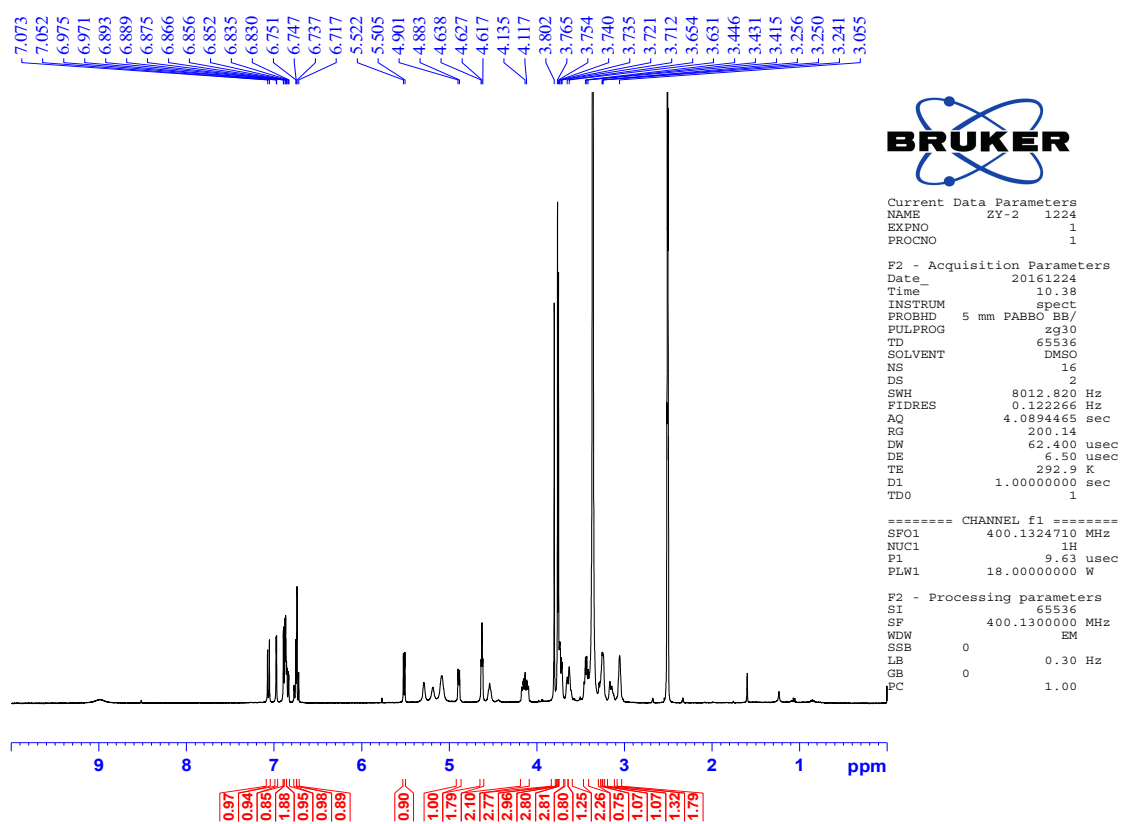

Figure S22. <sup>1</sup>H NMR spectrum of compound 3 (DMSO-*d*<sub>6</sub>, 500MHz)

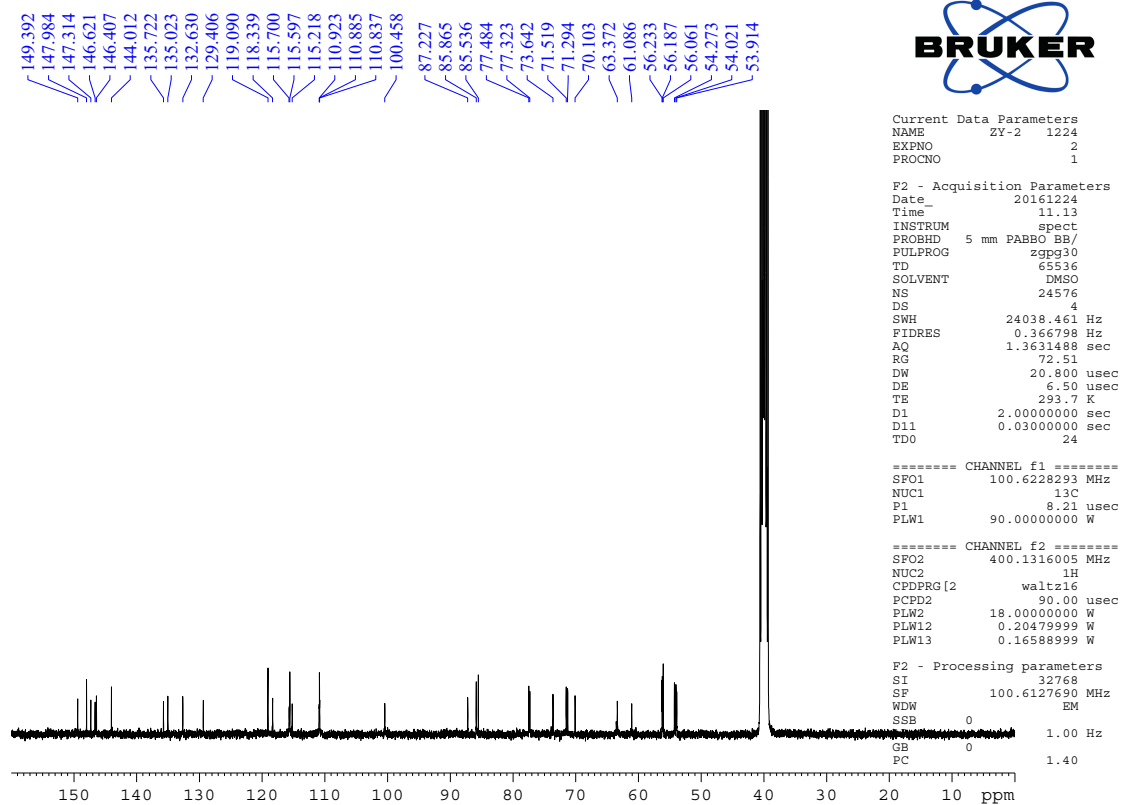

Figure S23.  $^{13}\text{C}$  NMR spectrum of compound **3** (DMSO- $d_6$ , 125MHz)

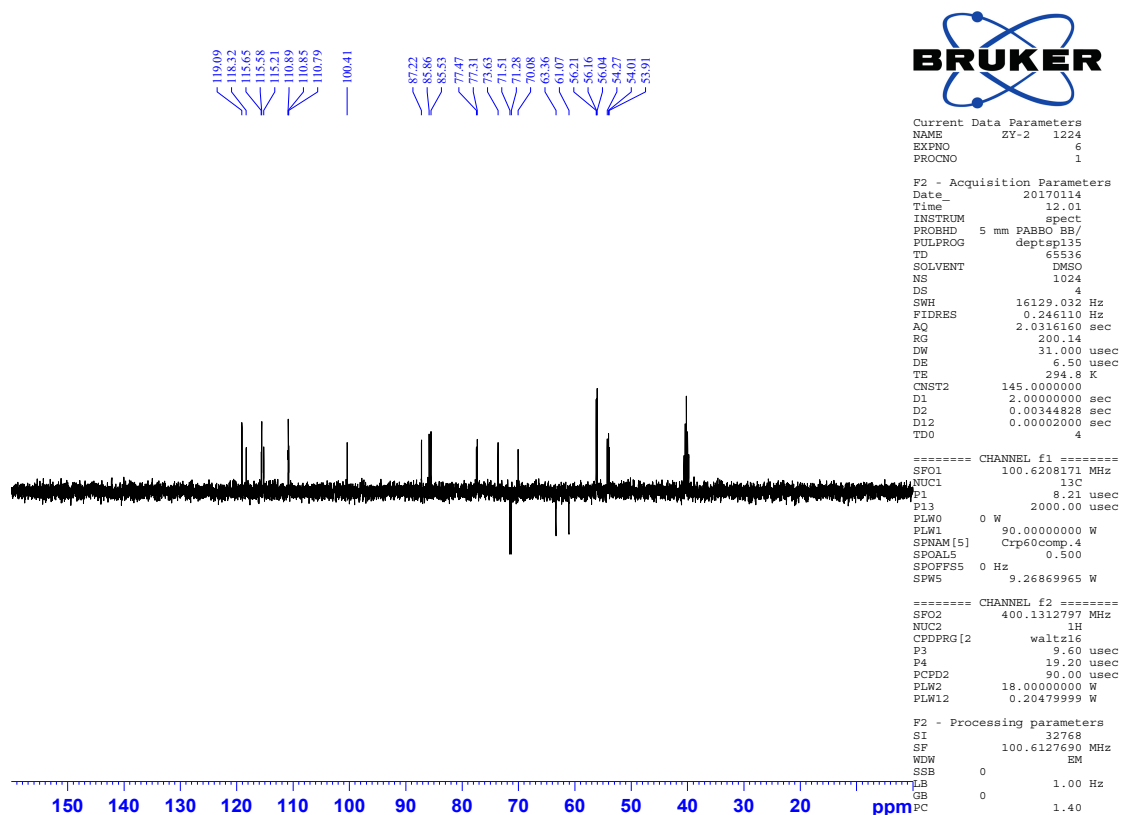

Figure S24. DEPT135 spectrum of compound **3** (DMSO- $d_6$ , 125MHz)

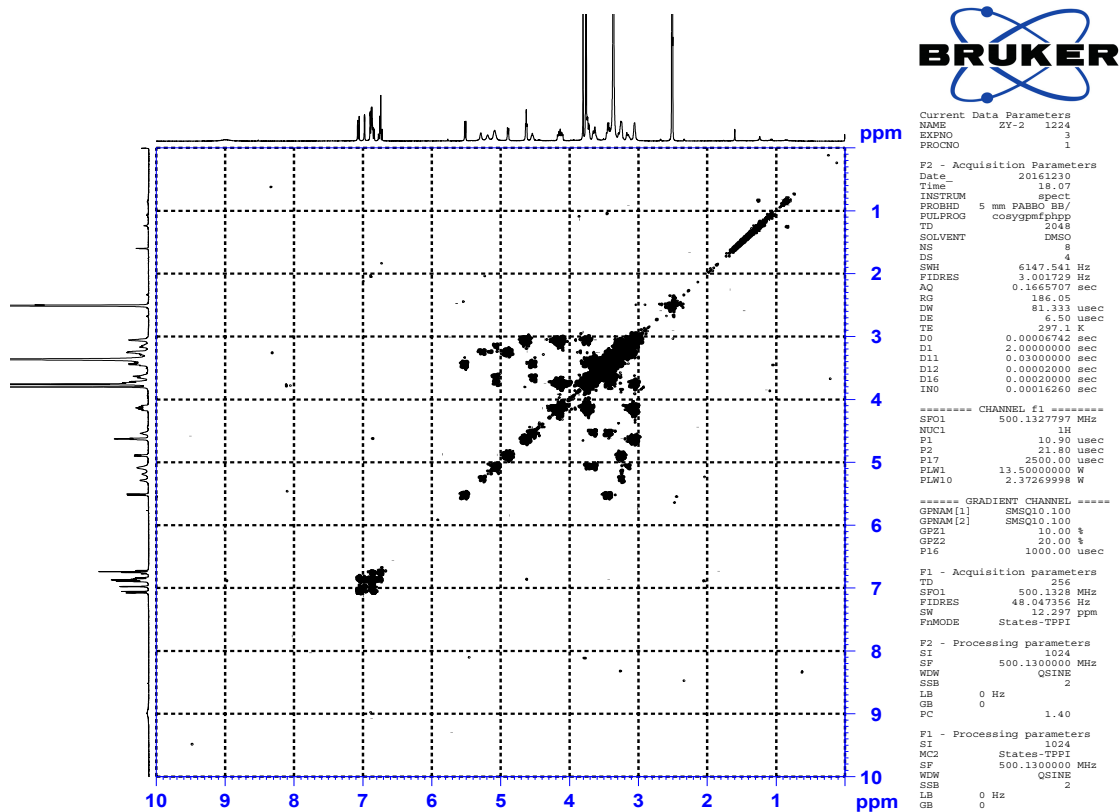

Figure S25.  $^1\text{H}$ - $^1\text{H}$  COSY spectrum of compound **3** (DMSO- $d_6$ , 500MHz)

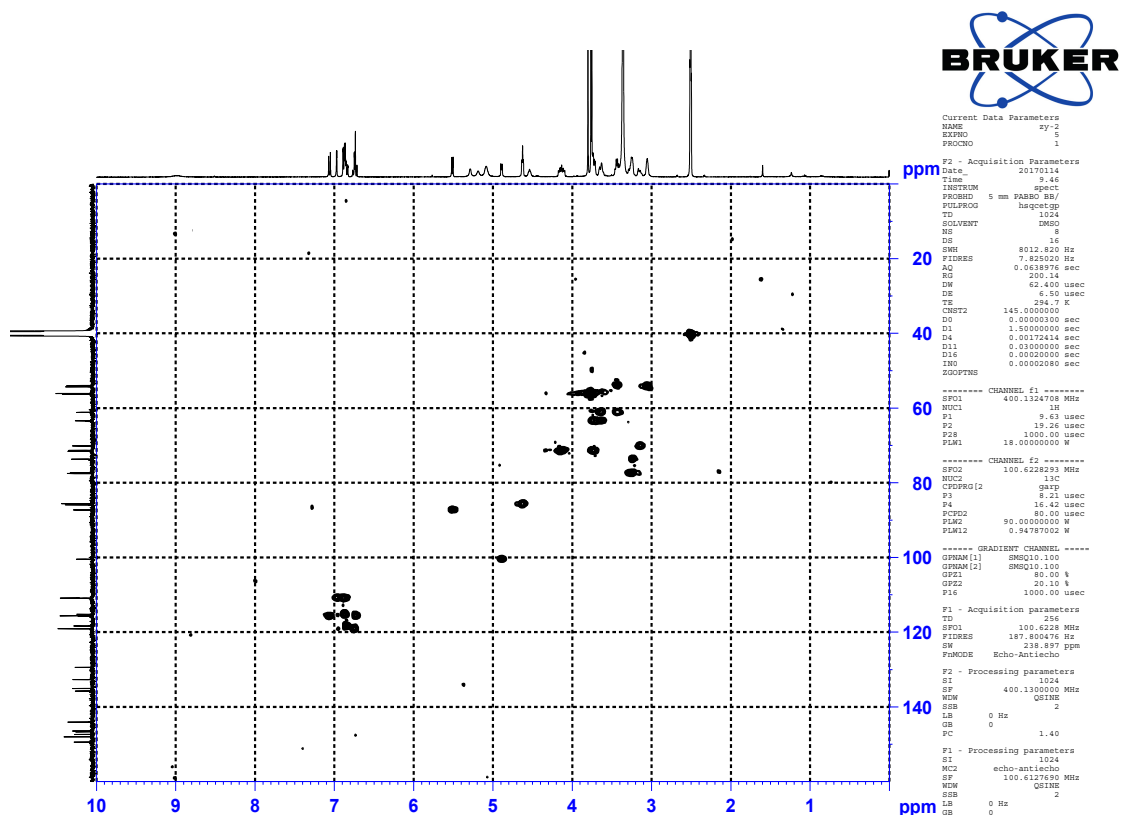

Figure S26. HSQC spectrum of compound **3** (DMSO- $d_6$ , 500MHz)



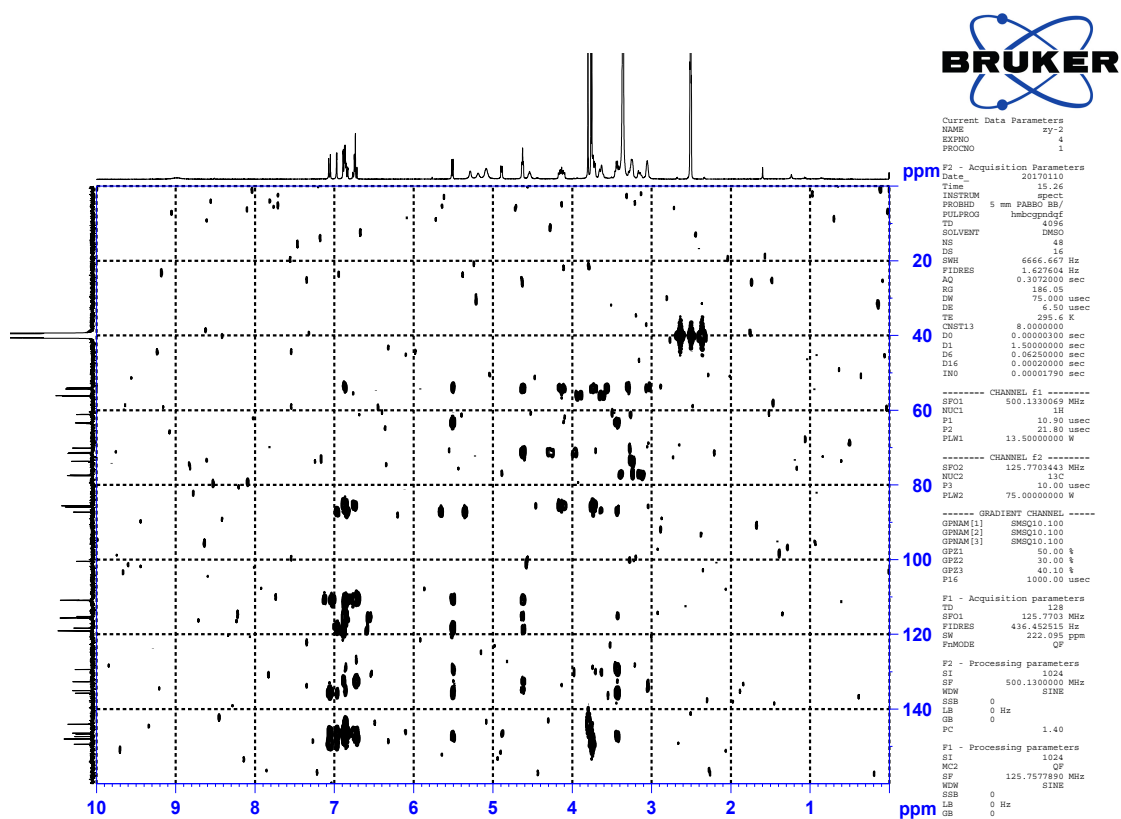

Figure S27. HMBC spectrum of compound **3** (DMSO-*d*<sub>6</sub>, 500MHz)

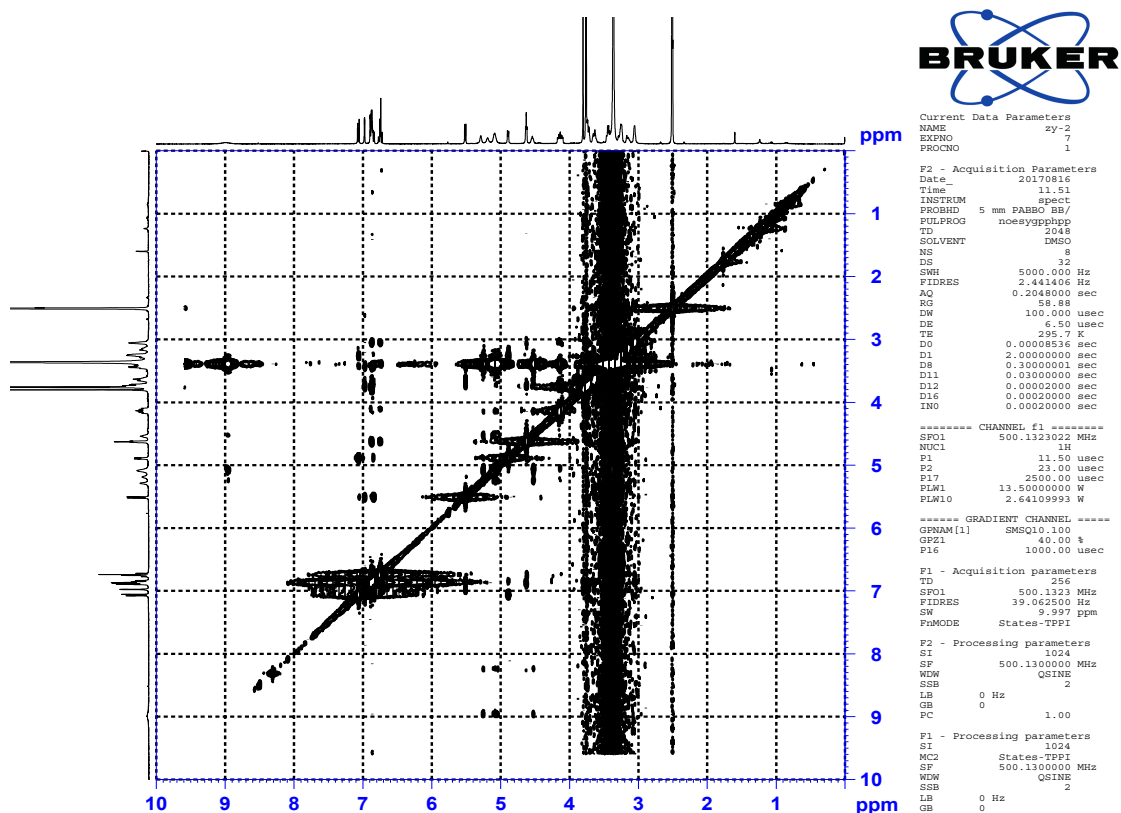

Figure S28. NOESY spectrum of compound **3** (DMSO-*d*<sub>6</sub>, 500MHz)

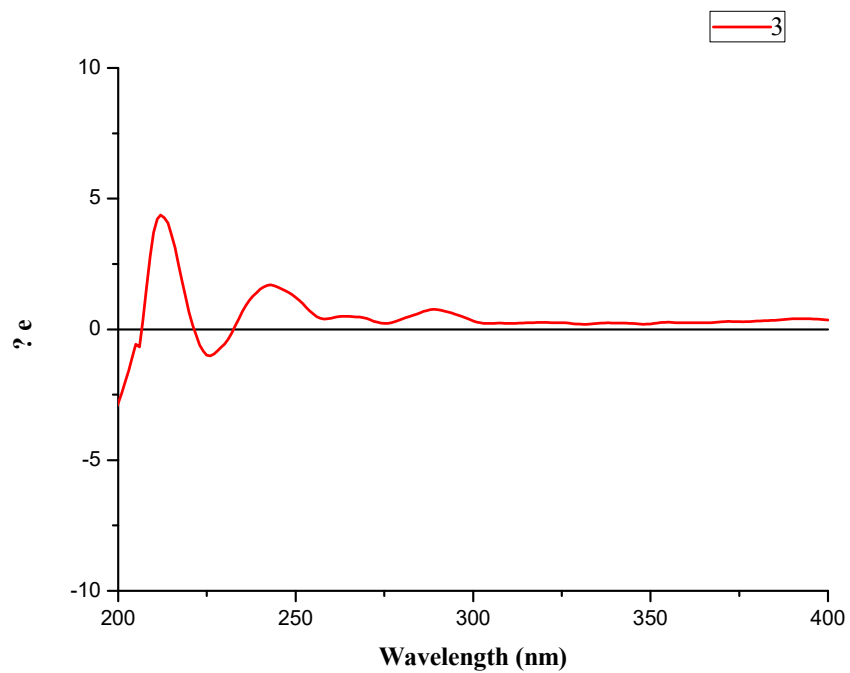

**Figure S29.** CD spectrum of compound **3** (in MeOH)

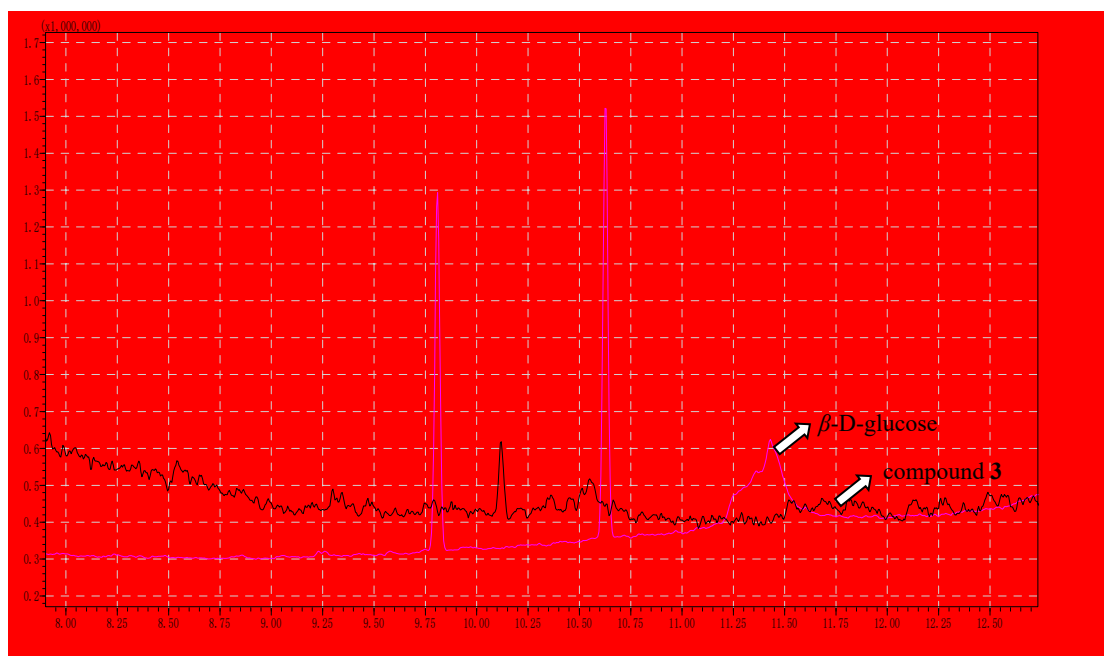

**Figure S30.** GC-MS spectrum of compound **3**

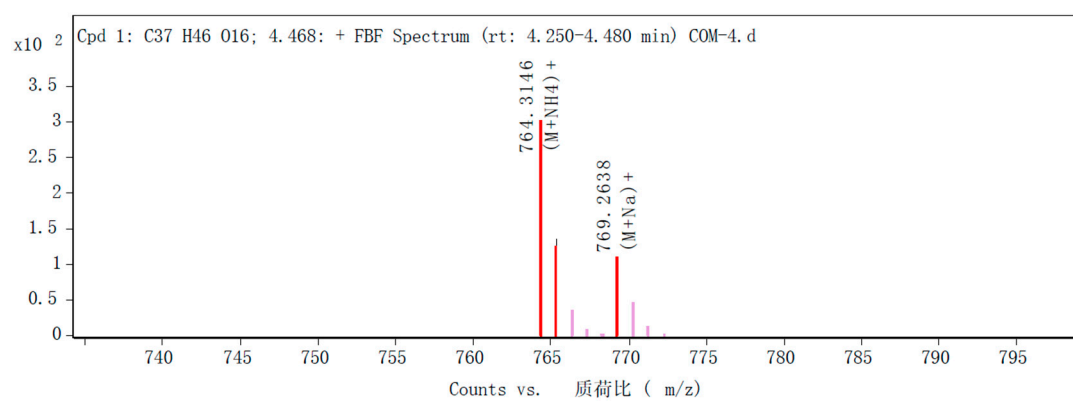

**Figure S31.** HRESIMS spectrum of compound **4**

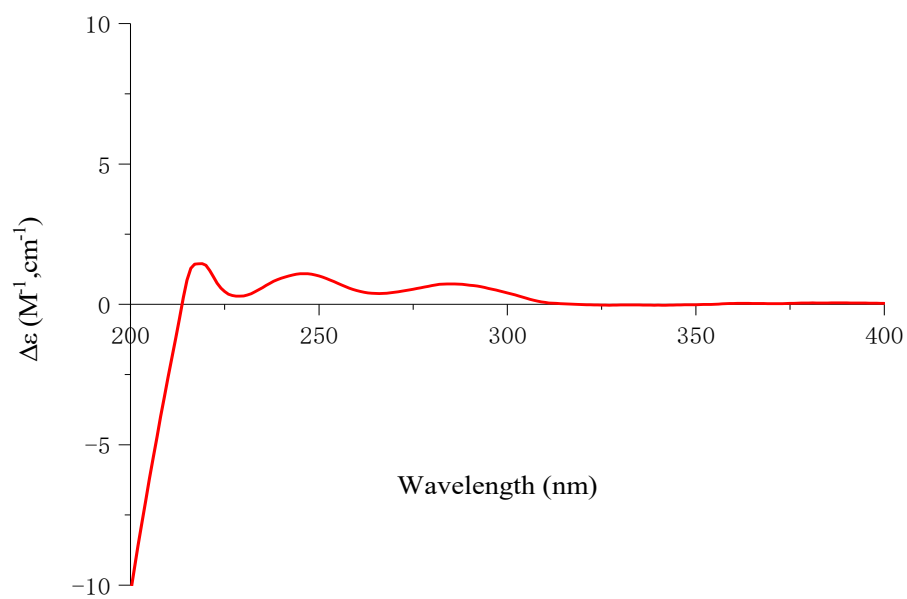

**Figure S32.** CD spectrum of compound **4** (in MeOH)

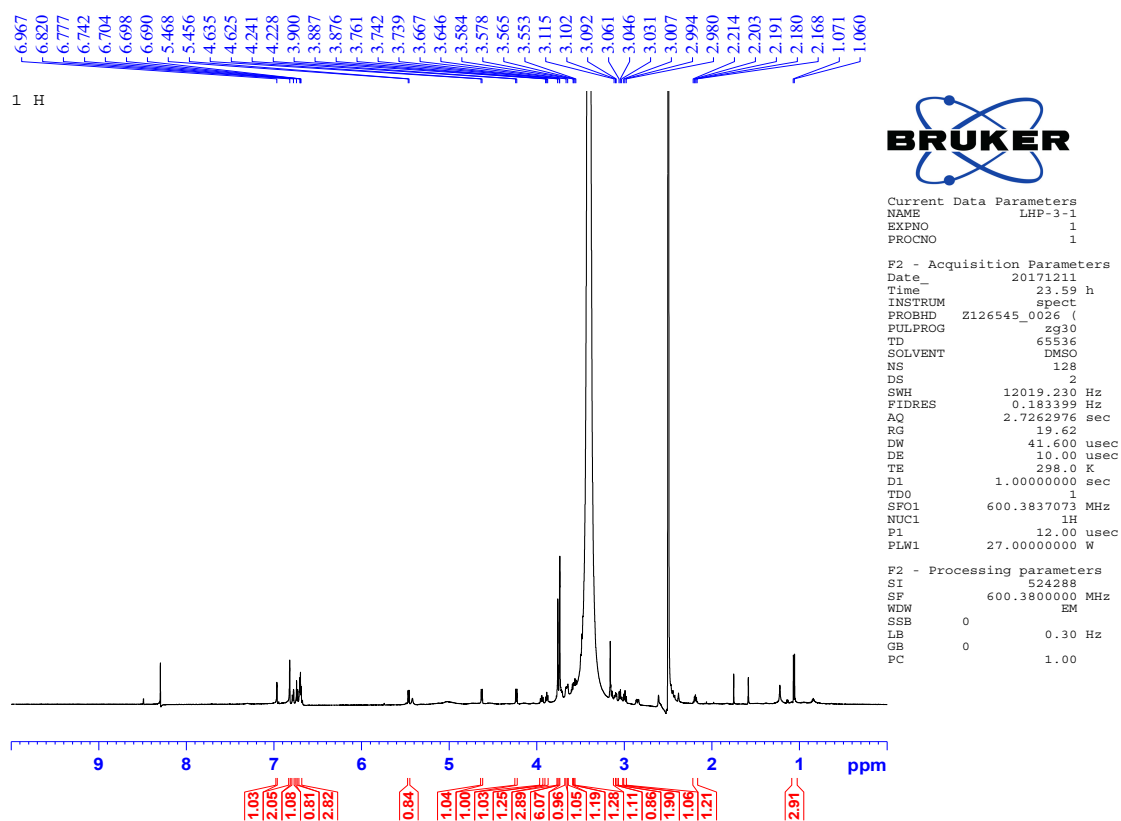

Figure S33.  $^1\text{H}$  NMR spectrum of compound **4** ( $\text{DMSO}-d_6$ , 500MHz)

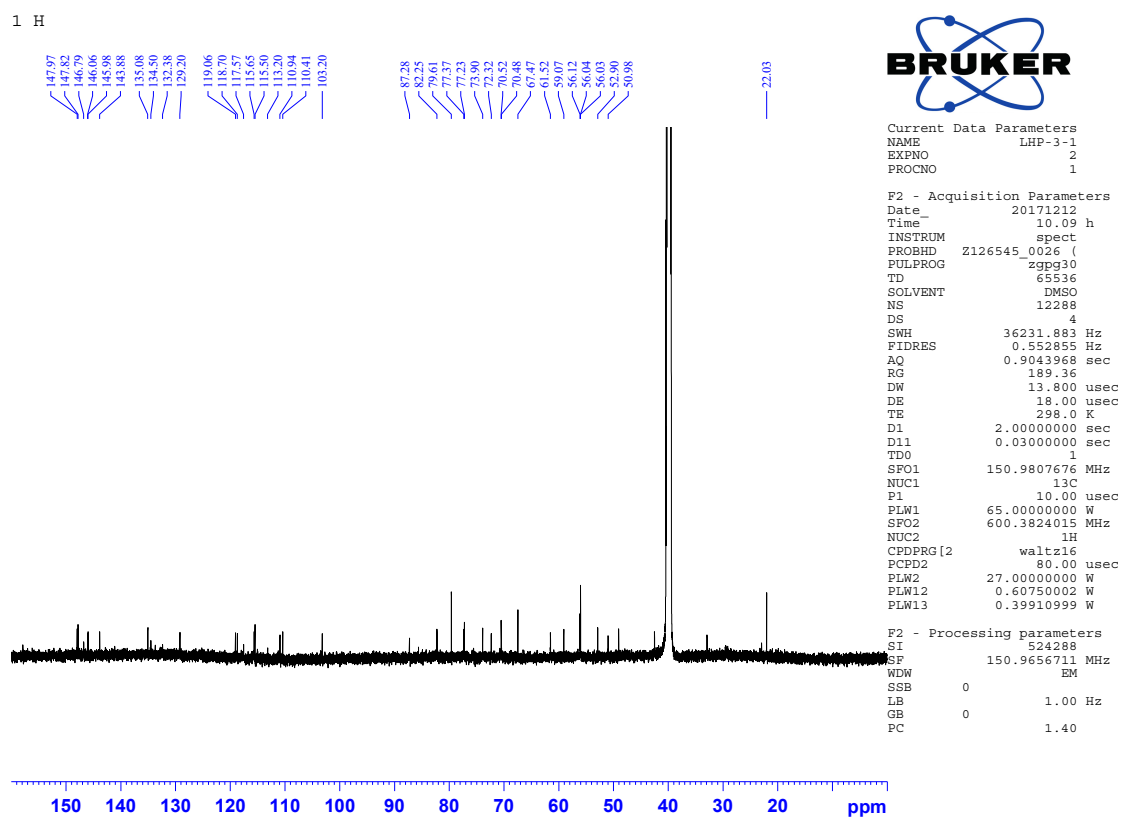

Figure S34.  $^{13}\text{C}$  NMR spectrum of compound **4** ( $\text{DMSO}-d_6$ , 125MHz)



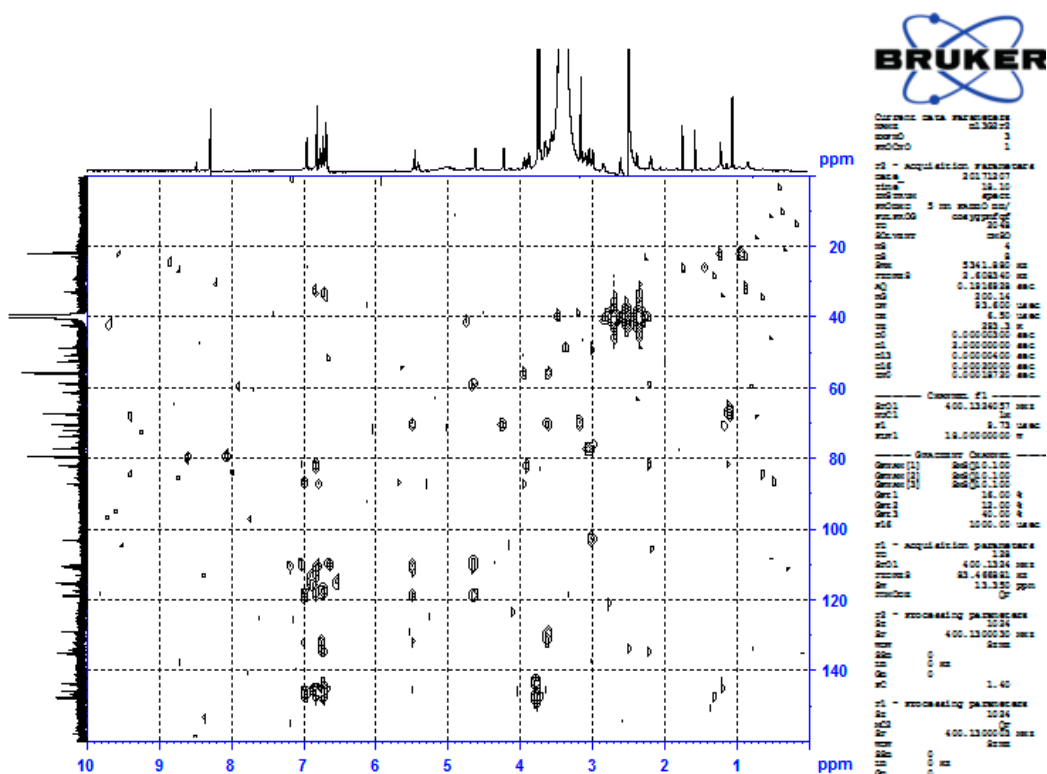

Figure S37. HMBC spectrum of compound 4 (DMSO- $d_6$ , 500MHz)

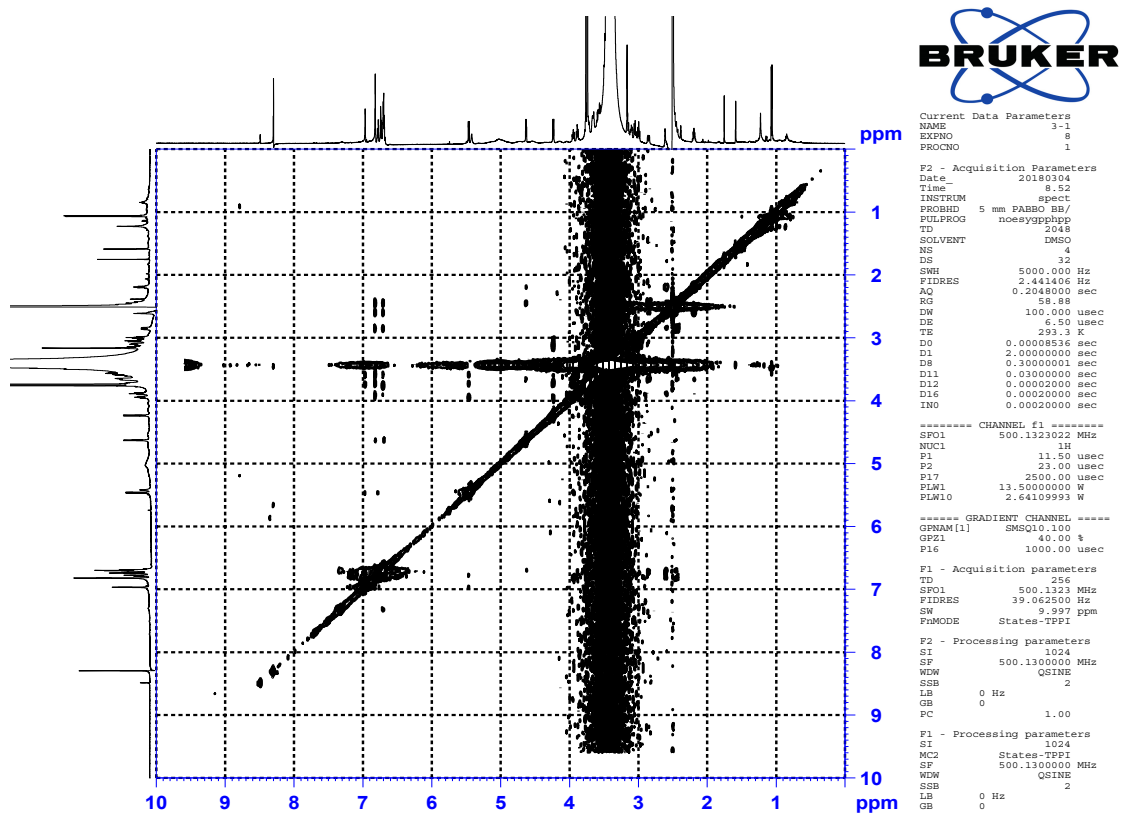

Figure S38. NOESY spectrum of compound 4 (DMSO- $d_6$ , 500MHz)

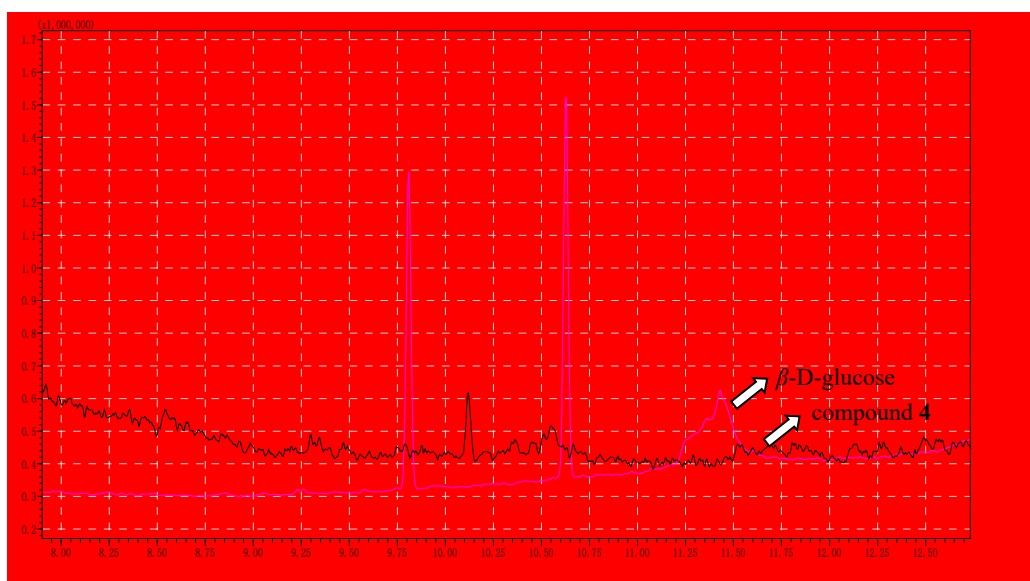

**Figure S39.** GC-MS spectrum of compound 4

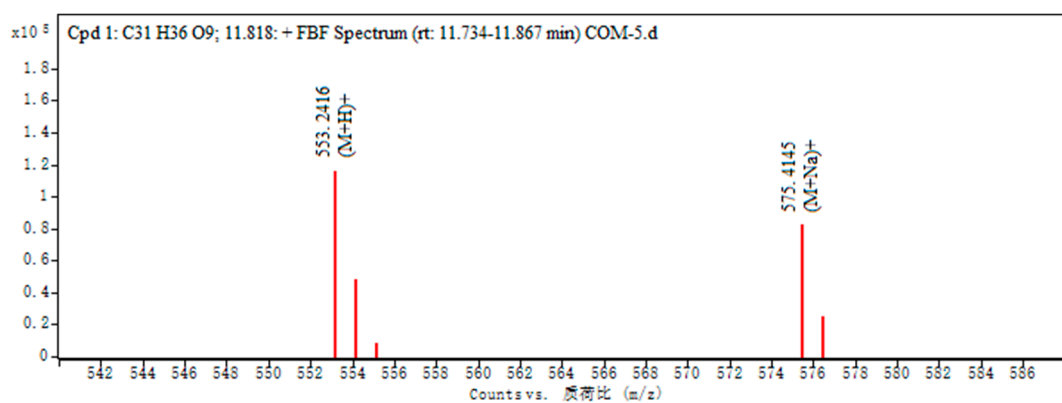

**Figure S40.** HRESIMS spectrum of compound 5

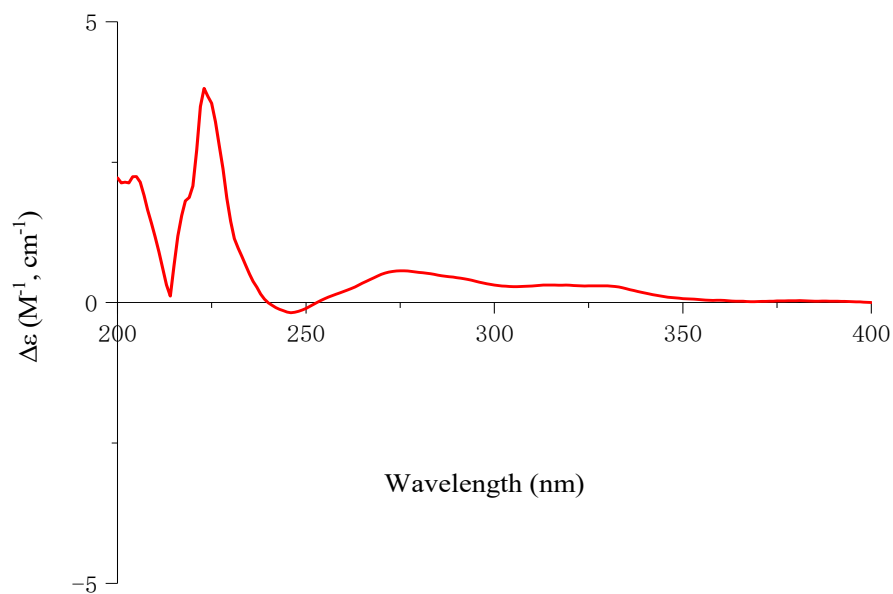

**Figure S41.** CD spectrum of compound **5** (in MeOH)

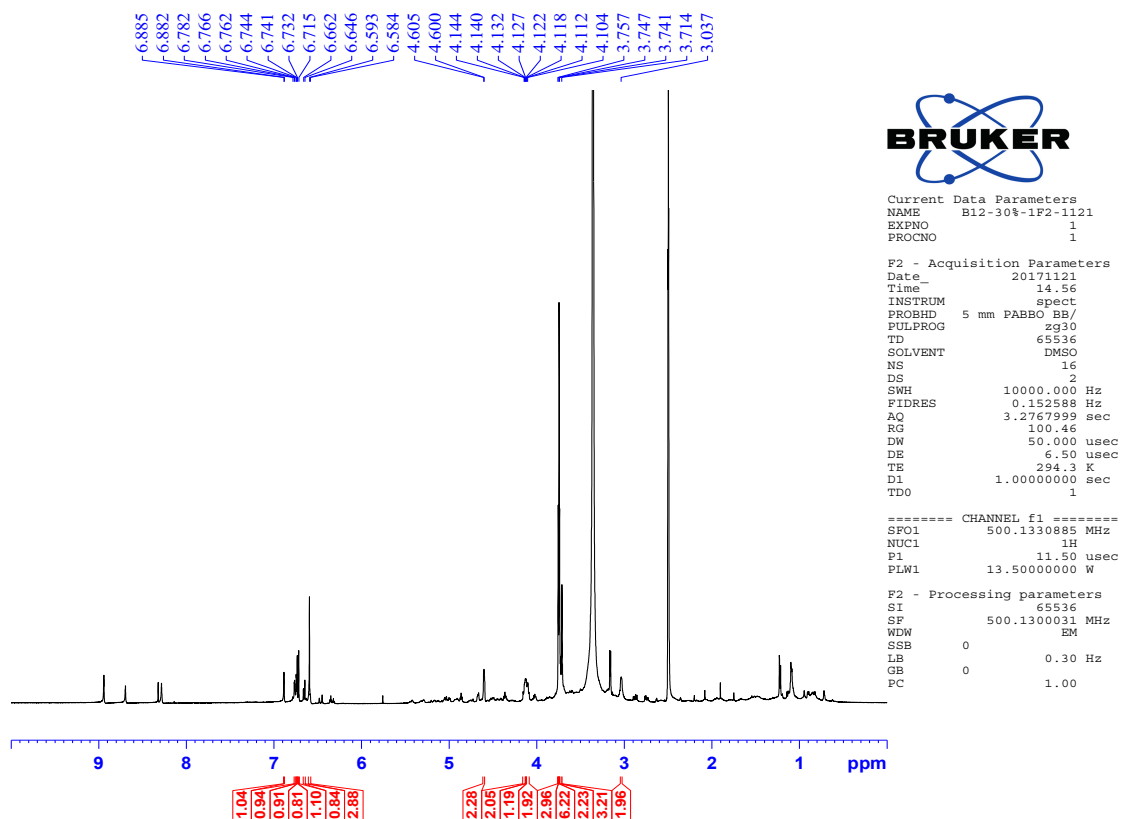

**Figure S42.**  $^1\text{H}$  NMR spectrum of compound **5** ( $\text{DMSO}-d_6$ , 500MHz)



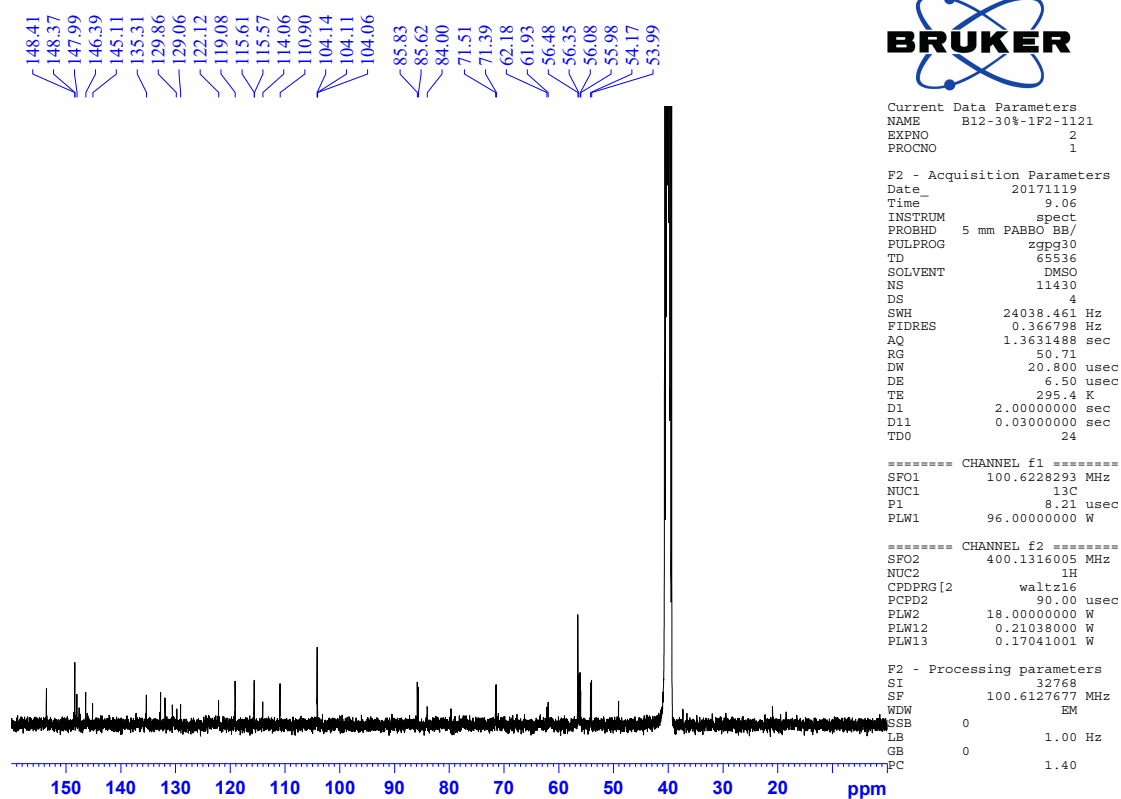

Figure S43.  $^{13}\text{C}$  NMR spectrum of compound **5** (DMSO- $d_6$ , 125MHz)

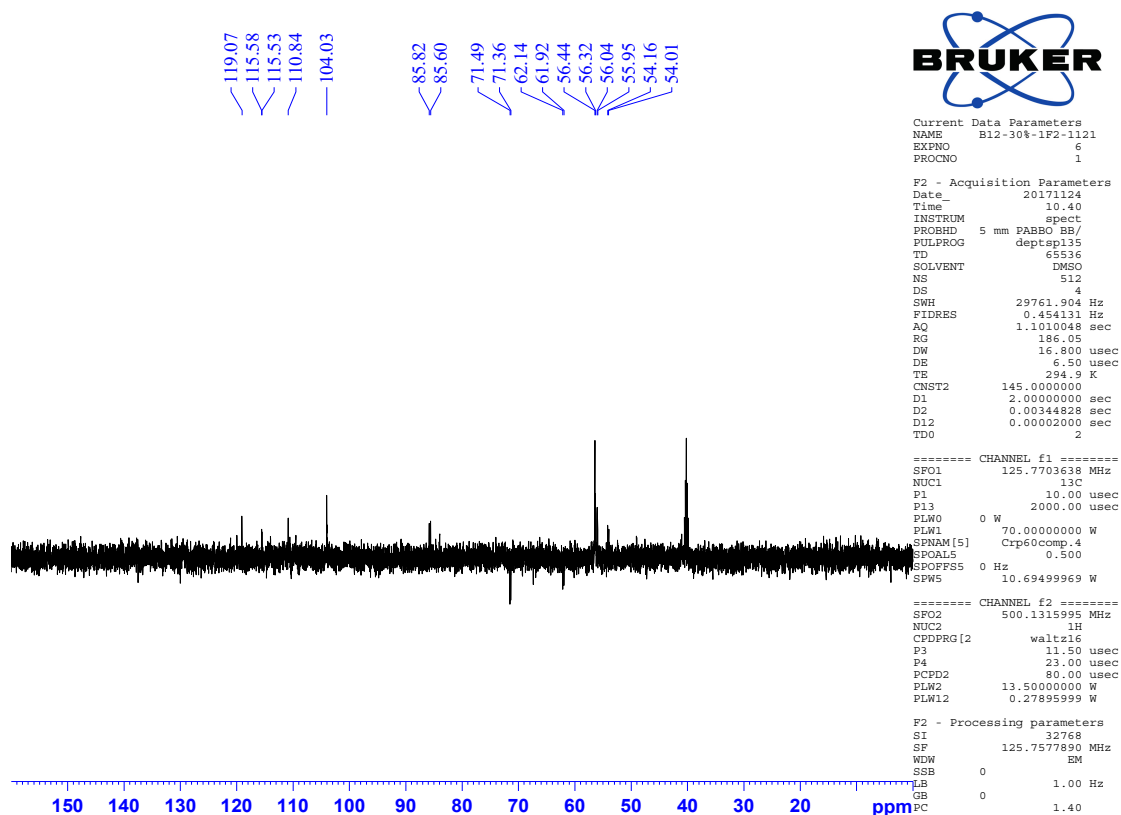

Figure S44. DEPT135 spectrum of compound **5** (DMSO- $d_6$ , 125MHz)

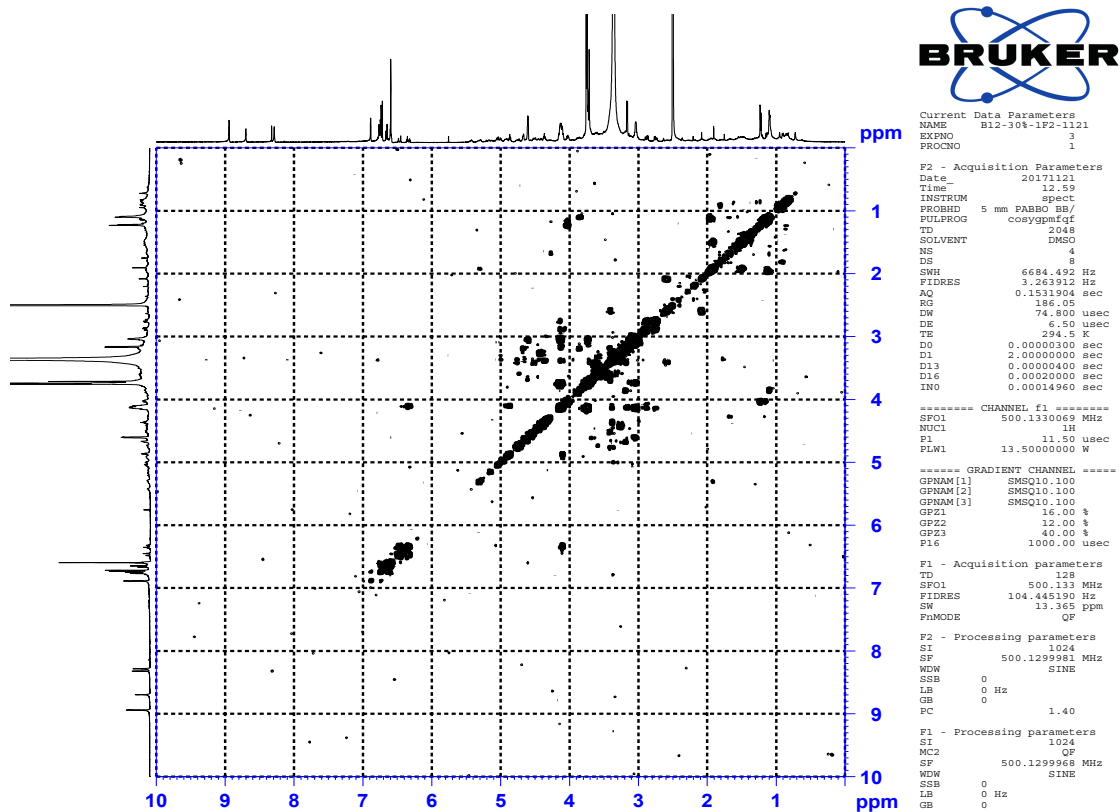

Figure S45.  $^1\text{H}$ - $^1\text{H}$  COSY spectrum of compound **5** (DMSO- $d_6$ , 500MHz)

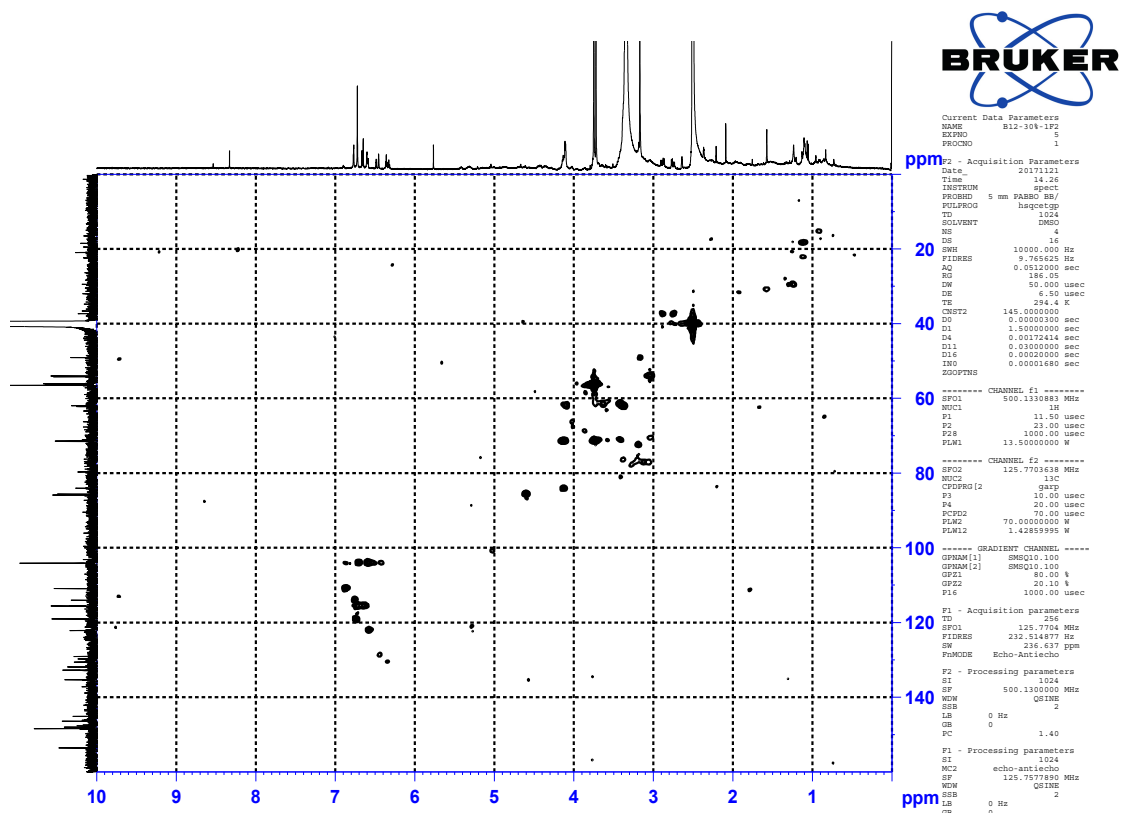

Figure S46. HSQC spectrum of compound **5** (DMSO- $d_6$ , 500MHz)

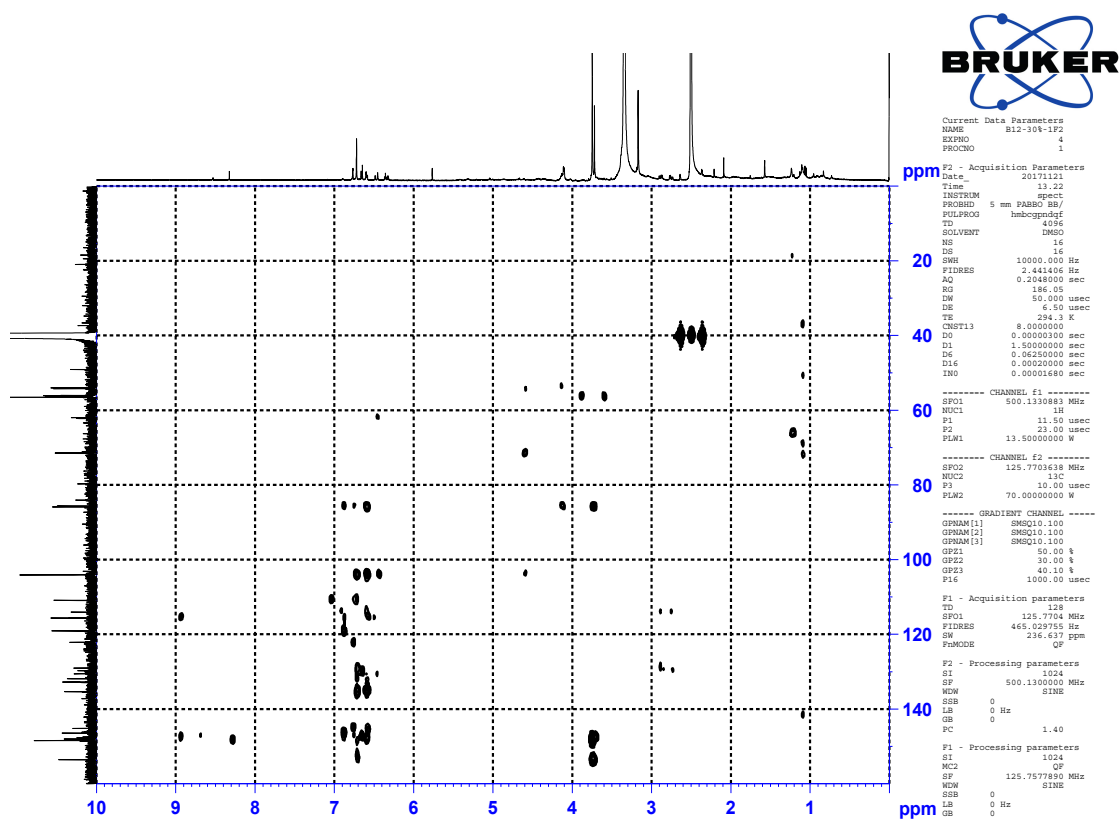

Figure S47. HMBC spectrum of compound **5** (DMSO-*d*<sub>6</sub>, 500MHz)

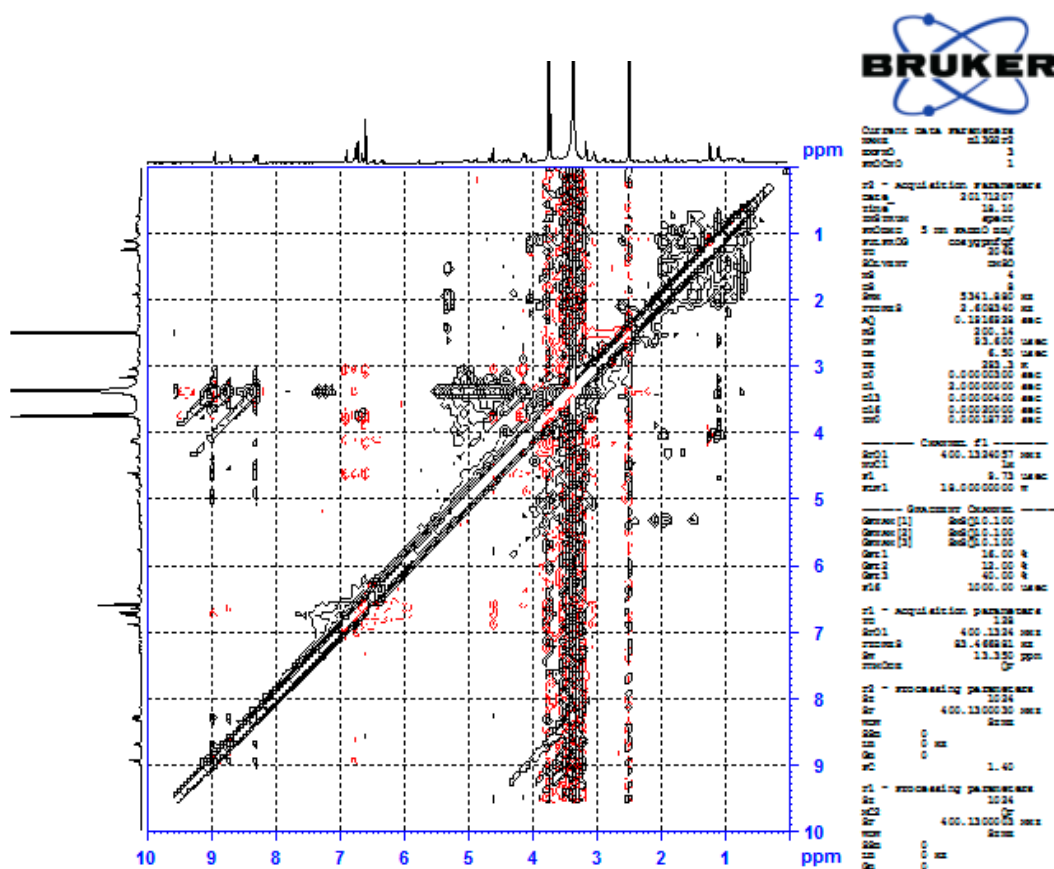

Figure S48. NOESY spectrum of compound **5** (DMSO-*d*<sub>6</sub>, 500MHz)
